# Supplementary material for: Rural emergency care 360°: mobilising healthcare professionals, decision-makers, patients and citizens to improve rural emergency care in the province of Quebec, Canada: a qualitative study protocol
Source: PubMed Central journal article supplement — BMJ Open. 2017 Aug 17;7(8):e016039. doi: 10.1136/bmjopen-2017-016039 (PMC5629661; doi:10.1136/bmjopen-2017-016039), 2017-08-17
Supplement: bmjopen-2017-016039.draft_revisions.pdf [file bmjopen-2017-016039.draft_revisions.pdf]

# BMJ Open

## Rural emergency care 360°: Mobilizing healthcare professionals, decision-makers, patients and citizens to improve rural emergency care in the province of Quebec, Canada: a study protocol

|                                 |                                                                                                                                                                                                                                                                                                                                                                                                                                                                            |
|---------------------------------|----------------------------------------------------------------------------------------------------------------------------------------------------------------------------------------------------------------------------------------------------------------------------------------------------------------------------------------------------------------------------------------------------------------------------------------------------------------------------|
| Journal:                        | <i>BMJ Open</i>                                                                                                                                                                                                                                                                                                                                                                                                                                                            |
| Manuscript ID                   | bmjopen-2017-016039                                                                                                                                                                                                                                                                                                                                                                                                                                                        |
| Article Type:                   | Protocol                                                                                                                                                                                                                                                                                                                                                                                                                                                                   |
| Date Submitted by the Author:   | 07-Mar-2017                                                                                                                                                                                                                                                                                                                                                                                                                                                                |
| Complete List of Authors:       | Fleet, Richard; Université Laval, Département de médecine familiale et de médecine d'urgence<br>Dupuis, Gilles; Université du Québec à Montréal,<br>Fortin, Jean-Paul; Centre intégré universitaire de santé et de services sociaux de la Capitale-Nationale<br>Gravel, Jocelyn; SainteJustine Hospital, Emergency<br>Ouimet, Mathieu; University of Laval, Political Science<br>Poitras, Julien; Université Laval,<br>Legare, France; CHU de Quebec and Université Laval, |
| <b>Primary Subject Heading</b>: | Emergency medicine                                                                                                                                                                                                                                                                                                                                                                                                                                                         |
| Secondary Subject Heading:      | Epidemiology, Health services research                                                                                                                                                                                                                                                                                                                                                                                                                                     |
| Keywords:                       | Rural emergency departments,, Health care, Performance, Unwarranted variations in practice                                                                                                                                                                                                                                                                                                                                                                                 |
|                                 |                                                                                                                                                                                                                                                                                                                                                                                                                                                                            |

SCHOLARONE™  
Manuscripts

1  
2  
3  
4  
5  
6 **Rural emergency care 360°: Mobilizing healthcare professionals, decision-makers, patients**  
7  
8 **and citizens to improve rural emergency care in the province of Quebec, Canada: a study**  
9  
10 **protocol**  
11  
12  
13  
14  
15  
16

17 **Richard Fleet, MD, PhD<sup>1,2</sup>, Gilles Dupuis, PhD<sup>3</sup>, Jean-Paul Fortin, MD<sup>4</sup>, Jocelyn Gravel,**  
18 **MD, MSc<sup>5</sup>, Mathieu Ouimet, PhD<sup>6</sup>, Julien Poitras, MD<sup>1,2</sup>, France Légaré, MD, PhD<sup>7</sup>**  
19  
20  
21  
22  
23  
24  
25  
26

27 <sup>1</sup>Department of Family and Emergency Medicine, Université Laval, Quebec, QC, Canada;

28  
29 <sup>2</sup>Research Chair in Emergency Medicine, CHAU-Hôtel-Dieu de Lévis (Université Laval); Lévis,  
30  
31 QC, Canada;

32  
33  
34 <sup>3</sup>Department of Psychology, Université du Québec à Montréal, Montreal, QC, Canada ;

35  
36 <sup>4</sup>Centre intégré universitaire de santé et de services sociaux de la Capitale-Nationale, Québec,  
37  
38 Canada ;

39  
40 <sup>5</sup>CHU Sainte-Justine, Université de Montréal, Montréal, Canada ;

41  
42  
43 <sup>6</sup>Department of Political Science, Université Laval, Quebec, QC, Canada;

44  
45  
46 <sup>7</sup>Department of Family Medicine and Emergency Medicine, Knowledge Transfer and Health  
47  
48 Technology Assessment Group of the CHU de Québec Research Centre, Unité de Recherche  
49  
50 Évaluative, Université Laval, Quebec, QC, Canada.  
51  
52  
53  
54  
55  
56  
57  
58  
59  
60

1  
2  
3 **Corresponding author:** Dr. Richard Fleet; CSSS Alphonse-Desjardins Research Centre, Hôtel-  
4  
5 Dieu de Lévis, 143 Wolfe Street, Lévis, QC, Canada, G6V 3Z1. Phone: +1 418-835-7121 ext.  
6  
7  
8 3173; Fax: +1 418-835-7276; Email:

9  
10 [rfleet@videotron.ca](mailto:rfleet@videotron.ca)  
11  
12  
13  
14  
15  
16  
17  
18  
19  
20  
21  
22  
23  
24  
25  
26  
27  
28  
29  
30  
31  
32  
33  
34  
35  
36  
37  
38  
39  
40  
41  
42  
43  
44  
45  
46  
47  
48  
49  
50  
51  
52  
53  
54  
55  
56  
57  
58  
59  
60

For peer review only

**Abstract:**

**Introduction:** Emergency departments (EDs) are an important safety net for rural populations. Results of our earlier studies suggest that rural Canadian hospitals have limited access to advanced imaging services and intensive care Units (ICUs) and that patients are transferred over large distances. They also revealed significant geographical variations in rural services. In the absence of national standards, our studies raise questions about inequities in rural access to emergency services and the risks for citizens. Our goal is to build recommendations for improving services by mobilizing stakeholders interested in rural emergency care. With help and full engagement of stakeholders, we will 1) identify solutions for improving quality and performance in rural emergency departments; 2) formulate and prioritize recommendations; 3) transfer knowledge of the recommendations to rural emergency departments and support operationalization ; 4) assess knowledge transfer and explore further impacts of this participatory action research project.

**Methodology.** We will use a participatory action research approach. We will plan for a governance structure that includes all stakeholder's representatives so throughout this project, stakeholders are fully engaged at every step. Our sample will be 26 emergency departments in rural Quebec. We will conduct semi-structured individual and focus group interviews with relevant and representative participants, including patients and citizens (estimated N=200). Interviews will be thematically analyzed to extract potential solutions and other qualitative information.

An expert panel ( $\pm 15$ ) will use an analysis grid to develop consensus recommendations from solutions suggested and will evaluate feasibility, impacts, costs, conditions for implementation,

1  
2  
3 and establish monitoring indicators. Recommendations will be transferred to stakeholders using  
4  
5 tailored knowledge translation strategies (web platform, meetings, etc.).  
6  
7  
8

9  
10 **Discussion and expected results.** This study will result in a comprehensive consensus list of  
11  
12 feasible and high-priority recommendations enabling decision-makers in emergency care to  
13  
14 implement improvements in rural emergency care in Quebec.  
15  
16

17  
18  
19 **Ethics and dissemination:** This protocol has been approved by the CSSS Alphonse-Desjardins  
20  
21 research ethics committee (Project number: MP 2017 - 009).  
22  
23  
24

### 25 26 27 **Strengths of this study**

- 28  
29 • First research project to mobilize a diverse group of stakeholders to find solutions for  
30  
31 improving care and services in Quebec rural emergency departments;  
32  
33
- 34  
35 • Consensus on a comprehensive list of feasible and high-priority recommendations for  
36  
37 improving the performance of Quebec rural emergency departments;  
38  
39
- 40  
41 • Recommendations will be immediately applicable and we will explore their impact by  
42  
43 evaluating and monitoring this knowledge mobilization initiative.  
44  
45

### 46 47 **Methodological limitation**

- 48  
49 • Participant selection not –randomized but theoretically representative;  
50  
51
- 52  
53 • Time-consuming involvement numerous and busy participants may limit recruitment  
54  
55

56 **Word count:** Abstract 317; Main text 2531  
57  
58  
59  
60

1  
2  
3  
4  
5  
6  
7  
8  
9  
10  
11  
12  
13  
14  
15  
16  
17  
18  
19  
20  
21  
22  
23  
24  
25  
26  
27  
28  
29  
30  
31  
32  
33  
34  
35  
36  
37  
38  
39  
40  
41  
42  
43  
44  
45  
46  
47  
48  
49  
50  
51  
52  
53  
54  
55  
56  
57  
58  
59  
60

**Keywords:** Rural emergency departments, Health care, Performance, Unwarranted variations in practice, Participatory action research

For peer review only

## Introduction

Providing high-quality emergency care in rural areas poses specific challenges that are understudied. Rural emergency departments (EDs) treat four million patients per year in Canada, representing 30% of all emergency consultations, while those living in rural areas are only 20% of the whole population [1-3]. Compared with urban populations, rural populations are older, in poorer health, and more at risk of injury [4-8]. Rural EDs represent an important safety net for rural populations, especially in contexts where there are few alternatives to hospital emergency services, many people are without a family doctor, and recruiting and retaining physicians is difficult [9]. Our previous work showed that access to care and services varies from one part of Canada to another (rural/urban, rural/rural) [3, 10]. In fact, 74% of rural EDs in Quebec have 24/7 access to a general surgeon, ICU and CT scans, elsewhere in the country fewer than 20% of EDs have access to these services[3, 10]. These variations in access to care suggest inequities in accessibility, quality and effectiveness of ED care and services across rural and urban EDs and raise questions about Canada's universal healthcare system. Moreover, in the past decade a wave of centralization of healthcare services has taken place, largely because of budgetary constraints and a shortage of medical personnel. This has led to a reduction of services in rural areas and the closure of several small community hospitals, contributing to the wide variations in practice observed today [2, 11, 12]. In the present context of growing needs and limited resources, policy-makers are reviewing emergency services and their place in the continuum of care. Policy-makers need evidence to inform their choices about allocation of emergency care and services for vulnerable populations in remote areas [2, 13, 14]. In 1997, the Canadian Association of Emergency Physicians (CAEP) made several recommendations about improving medical practice in rural EDs across the country [15]. However, the field of emergency medicine has evolved

1  
2  
3 significantly over the past 15 years [16] , and an update of these recommendations that is based  
4  
5 on recent evidence is needed.  
6  
7

8  
9  
10 The Quebec Ministry of Health and Social Services (MSSS) published an ED management guide  
11  
12 (Guide de gestion de l'urgence, 2000, updated 2006) [17], but it is clear that its use is not  
13  
14 widespread in rural EDs[16]. In spite of appeals for change, there is thus a crying need for  
15  
16 standards for rural EDs that their managers can turn to[2, 12, 13].  
17  
18

19  
20  
21 The main objective of this innovative participatory action research project is therefore to address  
22  
23 these practice variations and the absence of standards applied in the context of Quebec's rural  
24  
25 EDs. In collaboration with more than 200 rural emergency stakeholders and citizens, we plan to  
26  
27 co-produce recommendations for improving the performance of EDs that are both evidence-based  
28  
29 and respectful of the realities on the ground. Collaboration among stakeholders will identify  
30  
31 promising interventions, especially in the continuum of care, based on best evidence and on best  
32  
33 practices in similar situations. This process will bring existing solutions to light and adapt them to  
34  
35 the realities of rural contexts, increasing likelihood of the implementation of the  
36  
37 recommendations.  
38  
39  
40  
41  
42  
43  
44

45  
46 Potentials solutions for improving accessibility, quality and effectiveness of rural EDs Through  
47  
48 our extensive literature review, the results of our earlier research, the expertise of our  
49  
50 multidisciplinary team and the experience of our partners we have already identified the  
51  
52 following solutions that could improve accessibility, quality and cost-effectiveness in rural  
53  
54 emergency care and services: improvement of emergency prehospital care (e.g. optimization of  
55  
56 transfers); use of new technologies (e.g. telemedicine, Point of Care Ultrasound (POCUS) ;  
57  
58  
59  
60



1  
2  
3 optimal use of resources (e.g. access to medical specialists and facilities); training (e.g.  
4 simulation-based learning) and improved management procedures (e.g. facilitating the  
5 implementation of the ED management guide (“Guide de Gestion de l’urgence”); standardize  
6 databases for better measurement of quality indicators).  
7  
8  
9  
10  
11  
12  
13

### 14 **Improving emergency prehospital care using remote monitoring**

15  
16  
17  
18  
19  
20 The distances between tertiary care hospitals and rural residents limit their access to specialist  
21 services and facilities. Our data suggests that most rural EDs are more than 300 km from tertiary  
22 and secondary care trauma units, and an average of 300 inter-hospital transfers are required per  
23 year in each rural ED [3, 16] . The quality of emergency care in rural areas thus depends on the  
24 capacity to perform procedures locally and transfer patients who require it to the nearest referral  
25 centre after stabilizing them [18, 19] . This process must be both timely and safe. Inter-hospital  
26 transfers, however, are expensive and expose patients to complications (e.g. road accidents) [20,  
27 21]. Moreover, many patients who are in pain or have not been stabilized require a medical or  
28 nursing escort, which can cause staff shortages in the emergency room and is very expensive  
29 [22]. One promising solution is prehospital remote monitoring, whereby ambulance personnel  
30 and nurses can be supported from a distance [23].  
31  
32  
33  
34  
35  
36  
37  
38  
39  
40  
41  
42  
43  
44  
45  
46  
47

48 Training medical personnel Unlike emergency medicine professionals in urban areas, those in  
49 rural areas are proportionally less exposed to various medical situations, including trauma [24],  
50 and other serious clinical conditions. In addition, according to our data, one third of rural  
51 physicians have less than five years of practice experience and only 6% have had extra  
52 emergency medicine training. Rural physicians are requesting this training [25]. Simulation-  
53  
54  
55  
56  
57  
58  
59  
60

1  
2  
3 based learning or clinical immersion programs are promising innovations in medical education  
4  
5 that could meet the educational needs of rural emergency medicine professionals [26, 27].  
6  
7  
8  
9

### 10 **Quality improvement through standardization**

11  
12 The use of care protocols or guidelines in treating some emergency conditions, such as sepsis  
13 [28], strokes [29], cardiovascular problems as well as trauma could improve the quality of care  
14 [28, 30]. This would be a relevant and evidence-based approach to reducing practice variations.  
15  
16 However, the actual use of care protocols and their impacts on patient-care are unknown, in both  
17  
18 rural and urban contexts.  
19  
20  
21  
22  
23  
24  
25  
26

### 27 **Objectives**

28  
29 The main objectives of this study are therefore to

- 30  
31 1) Identify solutions for improving quality and performance in rural emergency departments by  
32 mobilise stakeholders (decision-makers, professionals, patients and citizens);  
33  
34 2) Formulate and prioritise recommendations based on solutions identified;  
35  
36 3) Transfer knowledge of recommendations to improve quality and performance in rural EDs and  
37 support their operationalisation;  
38  
39 4) Assess knowledge transfer and explore further impacts of the participatory action research  
40 project.  
41  
42  
43  
44  
45  
46  
47  
48  
49

### 50 **Methodology**

51  
52 We chose to use a participatory action research approach for this multipronged project [31]. Our  
53 hypothesis is that this process of knowledge co-construction will facilitate implementation of the  
54  
55 recommendations.  
56  
57  
58  
59  
60

## Selection of EDs and study participants

Participating rural EDs will be the same as in our earlier projects and represent 100% of Quebec rural EDs (N=26). Briefly, these are hospitals that offer 24/7 emergency coverage, including inpatient beds, and are situated in “rural or small towns” according to the Statistics Canada’s [32] definition (population more than 10,000 but density of less than 400 people per km<sup>2</sup>, population less than 10,000 but density of more than 400 people per km<sup>2</sup>, or population less than 10,000 and density of less than 400 people per km<sup>2</sup>). Two principles will guide the recruitment of participants: diverse points of view and data saturation [33]. Selection of participants for interviews will also proceed according to these criteria. Respect for representativity of the different types of EDs under study will take precedent over a statistical based representativity in recruiting all players and especially patients/citizens, in keeping with a research approach that emphasizes public involvement [34]. Recruitment will focus on relevant professions/positions. Local media and snowballing will be used for recruitment purposes. In addition, a “champion” will be identified in each rural ED. The champion approach is often used in projects where the researchers are far away from the study site. Champions are people who know the culture of the site and its particular concerns [35, 36]. They will collaborate with the research team throughout the project, especially as recruitment facilitators and knowledge brokers.

### Data collection:

***Objective 1: Mobilise stakeholders to propose solutions for improving quality and performance in rural EDs***

1  
2  
3 In the first phase of the project, the multiple stakeholders will be invited to participate in semi-  
4 structured focus groups [37] or individual interviews [38] to discuss potential solutions for  
5 improving accessibility, quality and effectiveness in rural EDs. The interview guide will address  
6 topics relating to the particularities of each rural region, the health and social care services  
7 available, the current situation of emergency services, the roles of the various emergency  
8 professionals, potential solutions for improving services, and barriers and facilitators to  
9 implementing these solutions.  
10  
11  
12  
13  
14  
15  
16  
17  
18  
19

20  
21  
22 Interviews will be planned as follows: a) ± 40 individual interviews with decision makers at all  
23 levels or the health system: “Ministère de la Santé et des Services sociaux (MSSS)”, regional  
24 health and social care centres, local point of care; b) ± four focus groups (± seven participants  
25 each), one for each profession identified (physicians, nurses, prehospital emergency services,  
26 psychosocial care); c) ± four focus groups with patients and citizens, one for each of the  
27 following categories: patient committee members, mayors, community workers, concerned  
28 citizens. The number of interviews will be increased until data saturation is reached. They will be  
29 led by a research professional with experience in qualitative research and will be recorded and  
30 transcribed verbatim.  
31  
32  
33  
34  
35  
36  
37  
38  
39  
40  
41  
42  
43  
44  
45

46 Thematic analysis of data using N’Vivo software will generate a coding tree (themes and  
47 subthemes) of solutions for improving performance in rural EDs. Qualitative information about  
48 these solutions (context, feasibility) will also be extracted [39]. The robustness and clarity of the  
49 categories will also be assessed through discussion with the research team [40].  
50  
51  
52  
53  
54  
55  
56  
57

58 ***Objective 2: Formulate and prioritise recommendations based on solutions identified***  
59  
60

1  
2  
3  
4  
5  
6 In the second phase of the project, the solutions identified through mobilizing stakeholders  
7  
8 (Objective 1) will be submitted to a panel of experts. This panel will formulate consensual  
9  
10 recommendations based on the solutions extracted and will evaluate their feasibility, impacts,  
11  
12 costs and conditions for their implementation. The expert panel ( $\pm 12$ ) will include members of  
13  
14 the research team, academia, university hospitals, professional associations and colleges as well  
15  
16 as our rural champions and partners [41].  
17  
18  
19  
20  
21

22 Selection criteria will be based on peer recognition and individual credibility. This panel will also  
23  
24 establish monitoring indicators for implementing the recommendations. The experts will use a  
25  
26 multidimensional analysis grid to evaluate each of the solutions identified in Phase 1 using a five-  
27  
28 point Likert scale and commenting on each measure. They will assign a priority to each measure  
29  
30 based on their assessment of , 1) effectiveness, 2) security or negative externalities, 3) costs, 4)  
31  
32 organizational impact (implementation). They will also be asked to comment on the conditions  
33  
34 for its implementation and indicate relevant monitoring indicators. Finally, in order to compare  
35  
36 solutions, the research team in collaboration with expert panel, will determine the weight of each  
37  
38 criteria Ex. Efficiency 30%, Security 30%, Costs, 10%, Organizational impact, 10% VS same  
39  
40 weight for all criteria.  
41  
42  
43  
44  
45  
46  
47

48 Data from this analysis grid will be used to guide discussions during the second expert  
49  
50 consultation, which will take place in person during a two-day meeting. Through their  
51  
52 deliberations, they will reach a consensus about the priority of the identified solutions and their  
53  
54 feasibility, with help from a facilitator with expertise in consensus activities. The consensus  
55  
56 recommendations (detailed descriptions, priority, feasibility, cost estimate etc.) will be compiled  
57  
58  
59  
60

1  
2  
3 in a document that will be the main deliverable at this stage. The document will also mention  
4  
5 other suggestions raised during Phase 1 but that were not part of the final consensus.  
6  
7  
8  
9

### 10 **3) Transfer knowledge of recommendations to improve quality and performance in** 11 12 **rural EDs and support their operationalisation** 13

14  
15  
16  
17 In Phase 3, the knowledge translation phase, the consensus recommendations produced in Phase  
18  
19 2 will be transferred to all the stakeholders involved in suggesting solutions and developing  
20  
21 recommendations in Phases 1 and 2. A variety of strategies will be implemented to connect with  
22  
23 stakeholders and accompany them in understanding, adapting, and adopting the  
24  
25 recommendations. The possible strategies (conferences, videoconferences, websites, social  
26  
27 media, communities of practice, etc.) will be defined according to the nature of the  
28  
29 recommendations that emerge from the research process and through discussion with our  
30  
31 stakeholders (our partners, site champions etc.). We will take care to adapt the knowledge,  
32  
33 messages and interventions to the needs of each audience. Our collaborators and co-researchers  
34  
35 will all contribute to accompanying the rural sites depending on the needs expressed in each case,  
36  
37 in a spirit of fostering partnerships between central and remote locations so that each can  
38  
39 understand the situation of the other.  
40  
41  
42  
43  
44  
45  
46  
47

### 48 **Objective 4: Assess knowledge transfer and explore further impacts of the participatory** 49 50 **action research project** 51

52  
53  
54  
55 We will assess the knowledge transfer and operationalisation in the targeted local sites with a  
56  
57 questionnaire validated beforehand that uses a Likert scale followed by open questions. The  
58  
59  
60

1  
2  
3 survey will assess a) knowledge of the recommendations; b) implementation of solutions to  
4 address identified barriers and facilitators; c) intention to adopt proposed solutions d) barriers and  
5 facilitators experienced on site by those implementing the recommendations; and e) satisfaction  
6 with the project/its relevance.  
7  
8  
9  
10  
11

12  
13  
14  
15 This online survey will take place at the end of Phase 3 (Period 0), then again five and eight  
16 months later. This survey will also enable us to measure the extent of stakeholders' participation  
17 in the project and retention rates, and to identify characteristics of sites that adopted (or not) some  
18 of the solutions and characteristics of the solutions that had the most impact.  
19  
20  
21  
22  
23  
24

25  
26  
27 The second part of our evaluation will be an exploratory assessment of the impacts of the changes  
28 initiated. Given that adopting recommendations takes time, the real impact of resulting changes  
29 on the performance of EDs could occur later, perhaps outside the project timetable. However, we  
30 will conduct an exploratory quantitative analysis of the associations between adoption of the  
31 recommendations and performance measures in emergency using the indicators determined by  
32 the expert panel in Phase 2. These indicators will be based mostly on those of the MSSS, the  
33 "Direction des soins urgents, de la traumatologie et du continuum Clinique (DSUTCC)" and the  
34 Canadian Institute for Health Information, as well as quality of care indicators proposed by  
35 Schull et al. [42], which we validated in earlier studies [43]. Some of the recommendations  
36 (training, telemedicine, etc.) may have an immediate impact on certain performance and quality  
37 of care indicators, and these will be measured (e.g. number of transfers, duration of transfers,  
38 treatment of specific conditions, etc.).  
39  
40  
41  
42  
43  
44  
45  
46  
47  
48  
49  
50  
51  
52  
53  
54

## 55 56 57 **Discussion and expected results** 58 59 60

1  
2  
3 This study is based on a participatory action research approach that fosters the application of  
4 scientific knowledge in practice and management [44, 45]. Our research should therefore result in  
5 relevant recommendations that are likely to be adopted. The recommendations resulting from this  
6 project could be added to a new version of the Quebec emergency management guide (MSSS,  
7 2006) and piloted by the, which is one of the knowledge users in this study. The results are also  
8 eagerly awaited by other emergency medicine associations and representatives in other provinces.  
9 This research experience, involving large-scale mobilisation, will serve as a model for improving  
10 performance in all areas of our health and social care system.  
11  
12  
13  
14  
15  
16  
17  
18  
19  
20  
21  
22  
23

24 Finally, we will be contributing to the science of knowledge translation. Ours is the only team  
25 focusing on mobilising rural communities to contribute to a reflection on rural emergency care.  
26 We will document knowledge translation strategies that are effective in this context, which is  
27 currently a gap in the literature [46].  
28  
29  
30  
31  
32  
33  
34  
35

### 36 **Acknowledgements**

37 We wish to thank the rural emergency staff of the province of Québec for participating in our  
38 previous study as well of the the “Direction des soins critiques et urgents Ministère de la Santé et  
39 des Services sociaux “. We also wish to thank our collaborators : Denise Trudel, Jean-Guy  
40 Trottier, Dr Alain Tanguay, Dre H el ene Sylvain, Mr. Daniel Par e, Dr Jean Ouellet, Dr Gilles  
41 Lortie, Dr Antoine Groulx, Dr Jean Marc Chauny, Mr. Maxime Laviolette, Mr. Patrice Aubertin,  
42 Dr Alex Pool, Dr Jeff Plant , Mr. Louis Luc Beaudoin, Mr. Jean-Fran ois Racine and and Mrs  
43 Catherine Turgeon-Pelchat.  
44  
45  
46  
47  
48  
49  
50  
51  
52  
53  
54  
55  
56  
57  
58  
59  
60



### Competing interests and Funding

The authors declare not having any financial or other conflicts of interest related to the submission. The research project is supported from the "Fonds de Recherche du Québec – Santé (FRQS) " 32825.

### Authors Contributors:

RF was responsible for the original idea, literature review and study design. He drafted the initial manuscript and its revised versions. GD, JPF, JG, FL, MO, JP contributed significantly to the manuscript drafting and preparation, revision and formatting the manuscript. RF have contributed to various aspects of the study design with input relating to their specific expertise in the field. All authors read and approved the final manuscript.

## References

1. Statistics Canada. Population, urban and rural, by province and territory. Available at: <http://www.statcan.gc.ca/tables-tableaux/sumsom/l01/cst01/demo62f-eng.htm>. Accessed November 18, 2014.
2. Fleet R, Archambault P, Plant J, Poitras J. Access to emergency care in rural Canada: should we be concerned? *Cjem*. 2013;15(4):191-3.
3. Fleet R, Poitras J, Maltais-Giguere J, Villa J, Archambault P. A descriptive study of access to services in a random sample of Canadian rural emergency departments. *BMJ open*. 2013;3(11):e003876.
4. Canadian Institute for Health Information. How Healthy Are Rural Canadians? An Assessment of Their Health Status and Health Determinants. Ottawa2006.
5. Fatovich DM, Jacobs IG. The relationship between remoteness and trauma deaths in Western Australia. *The Journal of trauma*. 2009;67(5):910-4.
6. S L. Rural Canada: Access to health care. Available at: <http://publications.gc.ca/Collection-R/LoPBdP/BP/prb0245-e.htm>. (Accessed September 26, 2014).
7. Peek-Asa C, Zwerling C, Stallones L. Acute traumatic injuries in rural populations. *American journal of public health*. 2004;94(10):1689-93.
8. Zakrison T, Ball CG, Kirkpatrick AW. Trauma in Canada: a spirit of equity & collaboration. *World journal of surgery*. 2013;37(9):2086-93.
9. Gauthier J HJ, Lamarche P, Lévesque JF, Morin D. Entre adaptabilité et fragilité : les conditions d'accès aux services de santé des communautés rurales et éloignées. Institut national de santé publique du Québec 2009.

- 1  
2  
3 10. Fleet R, Pelletier C, Marcoux J, et al. Differences in access to services in rural emergency  
4 departments of Quebec and Ontario. *PloS one*. 2015;10(4):e0123746.
- 5  
6  
7  
8 11. R C. Is regionalization working? *CMAJ*. 2010;182(4):331-2.
- 9  
10 12. Fleet R, Plant J, Ness R, Moola S. Patient advocacy by rural emergency physicians after  
11 major service cuts: the case of Nelson, BC. *Canadian journal of rural medicine : the*  
12 *official journal of the Society of Rural Physicians of Canada = Journal canadien de la*  
13 *medecine rurale : le journal officiel de la Societe de medecine rurale du Canada*.  
14 2013;18(2):56-61.
- 15  
16  
17 13. Romanow RBoV. The Future of Health Care in Canada. [Online, 2002]. Available at:  
18 [http://www.ubcmj.com/pdf/ubcmj\\_2\\_2\\_2011\\_7-8.pdf](http://www.ubcmj.com/pdf/ubcmj_2_2_2011_7-8.pdf) (Accessed september 29, 2015).
- 19  
20  
21 14. Bilbey N LS. Canadian Health Care: A Focus on Rural Medicine. *UBCMJ*; 2011.  
22 Available at: [http://www.ubcmj.com/pdf/ubcmj\\_2\\_2\\_2011\\_7-8.pdf](http://www.ubcmj.com/pdf/ubcmj_2_2_2011_7-8.pdf) (Accessed september  
23 29, 2015).
- 24  
25  
26 15. Canadian Association of Emergency Physicians. Recommendations for the management  
27 of rural, remote and isolated emergency health care facilities in Canada. 1997. Available  
28 at: [http://caep.ca/resources/position-statements-andguidelines/  
29 management-rural-remote-  
30 and-isolated-emergency-health-c](http://caep.ca/resources/position-statements-andguidelines/management-rural-remote-and-isolated-emergency-health-c) (Accesse September 26, 2014).
- 31  
32  
33 16. Fleet R, Poitras J, Archambault P, et al. Portrait of rural emergency departments in  
34 Quebec and utilization of the provincial emergency department management Guide: cross  
35 sectional survey. *BMC health services research*. 2015;15:572.
- 36  
37  
38 17. Ministère De La Santé Et Des Services Sociaux Du Québec. Guide de gestion de  
39 l'urgence. Québec: Gouvernement du Québec; 2006.
- 40  
41  
42 18. Fleet R, Poitras J. Have we killed the golden hour of trauma? *Annals of emergency*  
43 *medicine*. 2011;57(1):73-4; author reply 4-5.
- 44  
45  
46  
47  
48  
49  
50  
51  
52  
53  
54  
55  
56  
57  
58  
59  
60

- 1  
2  
3 19. Rourke JT, Kennard M. Emergency patient transfers from rural hospitals: a regional  
4 study. *Cjem*. 2001;3(4):296-301.  
5  
6
- 7  
8 20. Bosk EA, Veinot T, Iwashyna TJ. Which patients and where: a qualitative study of patient  
9 transfers from community hospitals. *Medical care*. 2011;49(6):592-8.  
10  
11
- 12  
13 21. Hains IM, Marks A, Georgiou A, Westbrook JI. Non-emergency patient transport: what  
14 are the quality and safety issues? A systematic review. *International journal for quality in*  
15 *health care : journal of the International Society for Quality in Health Care*.  
16 2011;23(1):68-75.  
17  
18  
19
- 20  
21 22. Ministère de la santé et des services sociaux. Services préhospitaliers: Urgence d'agir  
22 Rapport du Comité national sur les services préhospitaliers d'urgence (2014). Available  
23 at: <http://publications.msss.gouv.qc.ca/acrobat/f/documentation/2014/14-929-01W.pdf>  
24 (Accessed october 27, 2015).  
25  
26  
27  
28
- 29  
30 23. Charash WE, Caputo MP, Clark H, et al. Telemedicine to a moving ambulance improves  
31 outcome after trauma in simulated patients. *The Journal of trauma*. 2011;71(1):49-54;  
32 discussion 5.  
33  
34  
35  
36  
37
- 38  
39 24. Waymack JR, Markwell S, Milbrandt JC, Clark TR. Comparison of rates of emergency  
40 department procedures and critical diagnoses in metropolitan and rural hospitals. *Rural*  
41 *and remote health*. 2015;15(4):3298.  
42  
43  
44
- 45  
46 25. Drouin MA, Fleet R, Poitras J, et al. The Quebec rural emergency department project: a  
47 cross-sectional study of a potential two-pronged strategy in the knowledge transfer  
48 process. *PloS one*. 2015;10(4):e0120523.  
49  
50  
51
- 52  
53 26. Agha S, Alhamrani AY, Khan MA. Satisfaction of medical students with simulation based  
54 learning. *Saudi medical journal*. 2015;36(6):731-6.  
55  
56  
57  
58  
59  
60

- 1  
2  
3 27. Lateef F. Simulation-based learning: Just like the real thing. *Journal of emergencies, trauma, and shock*. 2010;3(4):348-52.  
4  
5  
6  
7  
8 28. Kuan WS, Ibrahim I, Leong BS, et al. Emergency Department Management of Sepsis  
9 Patients: A Randomized, Goal-Oriented, Noninvasive Sepsis Trial. *Annals of emergency medicine*. 2016;67(3):367-78.e3.  
10  
11  
12  
13  
14 29. Canadian Stroke Best Practice Recommendations. *Hyperacute stroke care* (2015).  
15 Available at: <http://www.strokebestpractices.ca/> (Accessed september 29, 2015).  
16  
17  
18  
19 30. Stewart M, Bledsoe J, Madsen T, et al. Utilization and Safety of a Pulmonary Embolism  
20 Treatment Protocol in an Emergency Department Observation Unit. *Critical pathways in cardiology*. 2015;14(3):87-9.  
21  
22  
23  
24  
25  
26  
27 31. Smith L RL, Schmidt M. Best practices in the reporting of participatory action research:  
28 Embracing both the forest and the trees. *The Counselling Psychologist*. 2010;38(8):1115-  
29 1138.  
30  
31  
32  
33 32. Statistique Canada, Definitions of rural. *Rural and Small Town Canada Analysis Bulletin*.  
34 2001;3(3):1- 17.  
35  
36  
37  
38 33. L S-Z. Comment peut-on construire un échantillonnage scientifiquement valide?  
39 *Recherches Qualitatives*; 2007(5):99-111.  
40  
41  
42  
43 34. Boivin A, Lehoux P, Burgers J, Grol R. What are the key ingredients for effective public  
44 involvement in health care improvement and policy decisions? A randomized trial process  
45 evaluation. *The Milbank quarterly*. 2014;92(2):319-50.  
46  
47  
48  
49 35. Damschroder LJ, Aron DC, Keith RE, Kirsh SR, Alexander JA, Lowery JC. Fostering  
50 implementation of health services research findings into practice: a consolidated  
51 framework for advancing implementation science. *Implementation science : IS*.  
52 2009;4:50.  
53  
54  
55  
56  
57  
58  
59  
60

- 1  
2  
3 36. MacDougall C, Fudge E. Planning and recruiting the sample for focus groups and in-  
4 depth interviews. *Qualitative health research*. 2001;11(1):117-26.  
5  
6  
7  
8 37. Morgan DLaRAK. *The Focus Group Kit (six book set)*. Thousand Oaks, Calif: Sage.  
9 1998.  
10  
11  
12 38. Savoie-Zajc L. L'entrevue semi-dirigée. Dans B. Gauthier (Dir.) : *Recherche sociale : de*  
13 *la problématique à la collecte de données (5e édition)*. Québec, Québec : Presses de  
14 l'Université du Québec. 2009.  
15  
16  
17  
18  
19 39. Paillé P, & Mucchielli, A. *L'analyse qualitative en sciences humaines et sociales*. Armand  
20 Colin. 2012.  
21  
22  
23  
24 40. Thomas D. A General Inductive Approach for Analyzing Qualitative Evaluation Data.  
25 2006; 27 (2): 237-246.  
26  
27  
28  
29 41. Jones J, Hunter D. Consensus methods for medical and health services research. *BMJ*  
30 (Clinical research ed). 1995;311(7001):376-80.  
31  
32  
33  
34 42. Schull MJ HC, Guttman A, Leaver CA, Vermeulen M, Rowe BH, Anderson GM,  
35 Zwarenstein M. . Development of a Consensus on Evidence-Based Quality of Care  
36 Indicators for Canadian Emergency Departments. ICES Investigative Report. Toronto:  
37 Institute for Clinical Evaluative Sciences; 2010.  
38  
39  
40  
41  
42  
43 43. Layani G, Fleet R, Dallaire R, et al. The challenges of measuring quality-of-care  
44 indicators in rural emergency departments: a cross-sectional descriptive study. *CMAJ*  
45 *open*. 2016;4(3):E398-e403.  
46  
47  
48  
49  
50 44. Israel BA, Schulz AJ, Parker EA, Becker AB. Review of community-based research:  
51 assessing partnership approaches to improve public health. *Annual review of public*  
52 *health*. 1998;19:173-202.  
53  
54  
55  
56  
57  
58  
59  
60

- 1  
2  
3 45. Jagosh J, Macaulay AC, Pluye P, et al. Uncovering the benefits of participatory research:  
4 implications of a realist review for health research and practice. *The Milbank quarterly*.  
5 2012;90(2):311-46.  
6  
7  
8  
9  
10 46. Parsons JE, Merlin TL, Taylor JE, Wilkinson D, Hiller JE. Evidence-based practice in  
11 rural and remote clinical practice: where is the evidence? *The Australian journal of rural*  
12 *health*. 2003;11(5):242-8.  
13  
14  
15  
16  
17  
18  
19  
20  
21  
22  
23  
24  
25  
26  
27  
28  
29  
30  
31  
32  
33  
34  
35  
36  
37  
38  
39  
40  
41  
42  
43  
44  
45  
46  
47  
48  
49  
50  
51  
52  
53  
54  
55  
56  
57  
58  
59  
60

# BMJ Open

## Rural emergency care 360°: Mobilizing healthcare professionals, decision-makers, patients and citizens to improve rural emergency care in the province of Quebec, Canada: a qualitative study protocol

|                                 |                                                                                                                                                                                                                                                                                                                                                                                                                                                                            |
|---------------------------------|----------------------------------------------------------------------------------------------------------------------------------------------------------------------------------------------------------------------------------------------------------------------------------------------------------------------------------------------------------------------------------------------------------------------------------------------------------------------------|
| Journal:                        | <i>BMJ Open</i>                                                                                                                                                                                                                                                                                                                                                                                                                                                            |
| Manuscript ID                   | bmjopen-2017-016039.R1                                                                                                                                                                                                                                                                                                                                                                                                                                                     |
| Article Type:                   | Protocol                                                                                                                                                                                                                                                                                                                                                                                                                                                                   |
| Date Submitted by the Author:   | 26-Apr-2017                                                                                                                                                                                                                                                                                                                                                                                                                                                                |
| Complete List of Authors:       | Fleet, Richard; Université Laval, Département de médecine familiale et de médecine d'urgence<br>Dupuis, Gilles; Université du Québec à Montréal,<br>Fortin, Jean-Paul; Centre intégré universitaire de santé et de services sociaux de la Capitale-Nationale<br>Gravel, Jocelyn; SainteJustine Hospital, Emergency<br>Ouimet, Mathieu; University of Laval, Political Science<br>Poitras, Julien; Université Laval,<br>Legare, France; CHU de Quebec and Université Laval, |
| <b>Primary Subject Heading</b>: | Emergency medicine                                                                                                                                                                                                                                                                                                                                                                                                                                                         |
| Secondary Subject Heading:      | Health services research, Medical management, Qualitative research                                                                                                                                                                                                                                                                                                                                                                                                         |
| Keywords:                       | Rural emergency departments,, Health care, Performance, Unwarranted variations in practice                                                                                                                                                                                                                                                                                                                                                                                 |
|                                 |                                                                                                                                                                                                                                                                                                                                                                                                                                                                            |

SCHOLARONE™  
Manuscripts



1  
2  
3  
4  
5  
6 **Rural emergency care 360°: Mobilizing healthcare professionals, decision-makers, patients**  
7 **and citizens to improve rural emergency care in the province of Quebec, Canada: a**  
8 **qualitative study protocol**  
9  
10  
11  
12  
13  
14  
15  
16

17 **Richard Fleet, MD, PhD<sup>1,2</sup>, Gilles Dupuis, PhD<sup>3</sup>, Jean-Paul Fortin, MD<sup>4</sup>, Jocelyn Gravel,**  
18 **MD, MSc<sup>5</sup>, Mathieu Ouimet, PhD<sup>6</sup>, Julien Poitras, MD<sup>1,2</sup>, France Légaré, MD, PhD<sup>7</sup>**  
19  
20  
21  
22  
23  
24  
25  
26

27 <sup>1</sup>Department of Family and Emergency Medicine, Université Laval, Quebec, QC, Canada;

28  
29 <sup>2</sup>Research Chair in Emergency Medicine, CHAU-Hôtel-Dieu de Lévis (Université Laval); Lévis,  
30  
31  
32  
33  
34  
35  
36  
37  
38  
39  
40  
41  
42  
43  
44  
45  
46  
47  
48  
49  
50  
51  
52  
53  
54  
55  
56  
57  
58  
59  
60

31  
32  
33  
34  
35  
36  
37  
38  
39  
40  
41  
42  
43  
44  
45  
46  
47  
48  
49  
50  
51  
52  
53  
54  
55  
56  
57  
58  
59  
60

34  
35  
36  
37  
38  
39  
40  
41  
42  
43  
44  
45  
46  
47  
48  
49  
50  
51  
52  
53  
54  
55  
56  
57  
58  
59  
60

41  
42  
43  
44  
45  
46  
47  
48  
49  
50  
51  
52  
53  
54  
55  
56  
57  
58  
59  
60

43  
44  
45  
46  
47  
48  
49  
50  
51  
52  
53  
54  
55  
56  
57  
58  
59  
60

46  
47  
48  
49  
50  
51  
52  
53  
54  
55  
56  
57  
58  
59  
60

1  
2  
3 **Corresponding author:** Dr. Richard Fleet; CSSS Alphonse-Desjardins Research Centre, Hôtel-  
4  
5 Dieu de Lévis, 143 Wolfe Street, Lévis, QC, Canada, G6V 3Z1. Phone: +1 418-835-7121 ext.  
6  
7  
8 3173; Fax: +1 418-835-7276; Email: [rfleet@videotron.ca](mailto:rfleet@videotron.ca)  
9  
10  
11  
12  
13  
14  
15  
16  
17  
18  
19  
20  
21  
22  
23  
24  
25  
26  
27  
28  
29  
30  
31  
32  
33  
34  
35  
36  
37  
38  
39  
40  
41  
42  
43  
44  
45  
46  
47  
48  
49  
50  
51  
52  
53  
54  
55  
56  
57  
58  
59  
60

For peer review only

**Abstract:**

**Introduction:** Emergency departments (EDs) are an important safety net for rural populations. Results of our earlier studies suggest that rural Canadian hospitals have limited access to advanced imaging services and intensive care Units (ICUs) and that patients are transferred over large distances. They also revealed significant geographical variations in rural services. In the absence of national standards, our studies raise questions about inequities in rural access to emergency services and the risks for citizens. Our goal is to build recommendations for improving services by mobilizing stakeholders interested in rural emergency care. With help and full engagement of stakeholders, we will 1) identify solutions for improving quality and performance in rural emergency departments; 2) formulate and prioritize recommendations; 3) transfer knowledge of the recommendations to rural emergency departments and support operationalization; 4) assess knowledge transfer and explore further impacts of this participatory action research project.

**Methodology:** We will use a participatory action research approach. We will plan for a governance structure that includes all stakeholders' representatives so throughout this project, stakeholders are fully engaged at every step. Our sample will be 26 emergency departments in rural Quebec. We will conduct semi-structured individual and focus group interviews with relevant and representative participants, including patients and citizens (estimated N=200). Interviews will be thematically analyzed to extract potential solutions and other qualitative information.

An expert panel ( $\pm 15$ ) will use an analysis grid to develop consensus recommendations from solutions suggested and will evaluate feasibility, impacts, costs, conditions for implementation,

1  
2  
3 and establish monitoring indicators. Recommendations will be transferred to stakeholders using  
4  
5 tailored knowledge translation strategies (web platform, meetings, etc.).  
6  
7  
8  
9

10 **Discussion and expected results:** This study will result in a comprehensive consensus list of  
11  
12 feasible and high-priority recommendations enabling decision-makers in emergency care to  
13  
14 implement improvements in rural emergency care in Quebec.  
15  
16

17  
18  
19 **Ethics and dissemination:** This protocol has been approved by the CSSS Alphonse-Desjardins  
20  
21 research ethics committee (Project number: MP 2017 - 009).  
22  
23  
24

25  
26  
27 **Strengths of this study:**

- 28  
29  
30
  - First research project to mobilize a diverse group of stakeholders to find solutions for  
31  
32 improving care and services in Quebec rural emergency departments;
  - Consensus on a comprehensive list of feasible and high-priority recommendations for  
33  
34 improving the performance of Quebec rural emergency departments;
  - Recommendations will be immediately applicable and we will explore their impact by  
35  
36 evaluating and monitoring this knowledge mobilization initiative.  
37  
38  
39  
40  
41  
42  
43  
44

45  
46 **Methodological limitation:**

- 47  
48
  - Participant selection not –randomized but theoretically representative;
  - Interviews and committee participation is time-consuming and participants with busy  
49  
50 schedules may decline participation or may not continue to the end of the study.  
51  
52  
53  
54

55  
56 **Word count:** Abstract 295; Main text 2750  
57  
58  
59  
60

1  
2  
3  
4  
5  
6  
7  
8  
9  
10  
11  
12  
13  
14  
15  
16  
17  
18  
19  
20  
21  
22  
23  
24  
25  
26  
27  
28  
29  
30  
31  
32  
33  
34  
35  
36  
37  
38  
39  
40  
41  
42  
43  
44  
45  
46  
47  
48  
49  
50  
51  
52  
53  
54  
55  
56  
57  
58  
59  
60

**Keywords:** Rural emergency departments, Health care, Performance, Unwarranted variations in practice, Participatory action research

For peer review only

## Introduction

Providing high-quality emergency care in rural areas poses specific challenges that are understudied. Rural emergency departments (EDs) treat four million patients per year in Canada, representing 30% of all emergency consultations, while those living in rural areas are only 20% of the whole population (1-3). Compared with urban populations, rural populations are older, in poorer health, and more at risk of injury (4-8). Rural EDs represent an important safety net for rural populations, especially in contexts where there are few alternatives to hospital emergency services, many people are without a family doctor, and recruiting and retaining physicians is difficult (9). Our previous work showed that access to care and services varies from one part of Canada to another (rural/urban, rural/rural) (3, 10). In fact, 74% of rural EDs in Quebec have 24/7 access to a general surgeon, ICU and CT scans, elsewhere in the country fewer than 20% of EDs have access to these services (3, 10). These variations in access to care suggest inequities in accessibility, quality and effectiveness of ED care and services across rural and urban EDs and raise questions about Canada's universal healthcare system. Moreover, in the past decade a wave of centralization of healthcare services has taken place, largely because of budgetary constraints and a shortage of medical personnel. This has led to a reduction of services in rural areas and the closure of several small community hospitals, contributing to the wide variations in practice observed today (2, 11, 12). In the present context of growing needs and limited resources, policy-makers are reviewing emergency services and their place in the continuum of care. Policy-makers need evidence to inform their choices about allocation of emergency care and services for vulnerable populations in remote areas (2, 13, 14). In 1997, the Canadian Association of Emergency Physicians (CAEP) made several recommendations about improving medical practice in rural EDs across the country (15). However, the field of emergency medicine has evolved

1  
2  
3 significantly over the past 15 years (16), and an update of these recommendations that is based on  
4  
5 recent evidence is needed.  
6  
7

8  
9  
10 The Quebec Ministry of Health and Social Services (MSSS) published an ED management guide  
11  
12 (Guide de gestion de l'urgence, 2000, updated 2006) (17), but it is clear that its use is not  
13  
14 widespread in rural EDs (16). In spite of appeals for change, there is thus an urgent need for  
15  
16 standards for rural EDs that managers of these EDs can turn to (2, 12, 13).  
17  
18

19  
20  
21 The main objective of this innovative participatory action research project is therefore to address  
22  
23 these practice variations and the absence of standards applied in the context of Quebec's rural  
24  
25 EDs. In collaboration with more than 200 rural emergency stakeholders and citizens, we plan to  
26  
27 co-produce recommendations for improving the performance of EDs that are both evidence-based  
28  
29 and respectful of the constraints of real world concerns. Collaboration among stakeholders will  
30  
31 identify promising interventions, especially in the continuum of care, based on best evidence and  
32  
33 on best practices in similar situations. This process will bring existing solutions to light and adapt  
34  
35 them to the realities of rural contexts, increasing likelihood of the implementation of the  
36  
37 recommendations.  
38  
39  
40  
41  
42  
43  
44  
45

### 46 **Potentials solutions for improving accessibility, quality and effectiveness of rural EDs**

47  
48 Through our literature review and the results of our earlier research, the expertise of our  
49  
50 multidisciplinary team and the experience of our partners we have already identified the  
51  
52 following solutions that could improve accessibility, quality and cost-effectiveness in rural  
53  
54 emergency care and services: improvement of emergency prehospital care (e.g. optimization of  
55  
56 transfers); use of new technologies (e.g. telemedicine, Point of Care Ultrasound (POCUS));  
57  
58  
59  
60

1  
2  
3 optimal use of resources (e.g. access to medical specialists and facilities); training (e.g.  
4 simulation-based learning) and improved management procedures (e.g. facilitating the  
5 implementation of the ED management guide (“Guide de gestion de l’urgence”); standardize  
6 databases for better measurement of quality indicators). These solutions will be proposed to  
7 participants of our study in order to validate the potential usefulness and applicability.  
8  
9

### 17 **Improving emergency prehospital care using remote monitoring**

19 The distances between tertiary care hospitals and rural residents limit their access to specialist  
20 services and facilities. Our data suggests that most rural EDs are more than 300 km from tertiary  
21 and secondary care trauma units, and an average of 300 inter-hospital transfers are required per  
22 year in each rural ED (3, 16). The quality of emergency care in rural areas thus depends on the  
23 capacity to perform procedures locally and transfer patients who require it to the nearest referral  
24 centre after stabilizing them (18, 19). This process must be both timely and safe. Inter-hospital  
25 transfers, however, are expensive and expose patients to complications (e.g. road accidents) (20,  
26 21). Moreover, many patients who are in pain or have not been stabilized require a medical or  
27 nursing escort, which can cause staff shortages in the emergency room and is very expensive  
28 (22). One promising solution is prehospital remote monitoring, whereby ambulance personnel  
29 and nurses can be supported from a distance (23).  
30  
31  
32  
33  
34  
35  
36  
37  
38  
39  
40  
41  
42  
43  
44  
45  
46  
47

### 48 **Training medical personnel**

49 Unlike emergency medicine professionals in urban areas, those in rural areas are proportionally  
50 less exposed to various medical situations, including managing trauma related injuries (24), and  
51 other serious clinical conditions. In addition, according to our data, one third of rural physicians  
52 have less than five years of practice experience and only 6% have had extra emergency medicine  
53  
54  
55  
56  
57  
58  
59  
60



1  
2  
3 training – CCFP (EM) Canadian College of Family Medicine certification of special competency  
4  
5 in emergency medicine (total of 3 years post-graduate (MD) training), or Fellowship of the Royal  
6  
7 College of Physicians speciality in emergency medicine (FRCPE) (5 years post-graduate (MD)  
8  
9 training. Rural physicians are requesting additional training (25). Simulation-based learning or  
10  
11 clinical immersion programs are promising innovations in medical education that could meet the  
12  
13 educational needs of rural emergency medicine professionals (26, 27).  
14  
15  
16  
17  
18  
19

### 20 **Quality improvement through standardization**

21  
22 The use of care protocols or guidelines in treating some emergency conditions, such as sepsis  
23  
24 (28), strokes (29), cardiovascular problems as well as trauma could improve the quality of care  
25  
26 (28, 30). This would be a relevant and evidence-based approach to reducing practice variations.  
27  
28 However, the actual use of care protocols in both rural and urban contexts and their respective  
29  
30 impacts on patient-care and health are unknown.  
31  
32  
33  
34  
35

### 36 **Objectives**

37  
38 The main objectives of this study are therefore to:

- 39  
40  
41 1) Identify solutions for improving quality and performance in rural emergency departments by  
42  
43 mobilizing stakeholders (decision-makers, professionals, patients and citizens);  
44  
45 2) Formulate and prioritize recommendations based on solutions identified;  
46  
47  
48 3) Transfer knowledge of recommendations to improve quality and performance in rural EDs and  
49  
50 support the implementation of the recommendations and identified solutions;  
51  
52 4) Assess knowledge transfer and explore further impacts of the participatory action research  
53  
54 project.  
55  
56  
57  
58  
59  
60

## Methodology

We chose to use a participatory action research approach for this multipronged project (31). Our hypothesis is that this process of knowledge co-construction will facilitate implementation of the recommendations.

### Selection of EDs and study participants

Participating rural EDs will mostly be the same as in our earlier projects and represent 100% of Quebec rural EDs (N=26). Ongoing changes, including mergers, in the Quebec hospital system may slightly affect our selection criteria at the time of the study's onset. Briefly, these are hospitals that offer 24/7 emergency coverage, including inpatient beds, and are situated in "rural or small towns" according to the Statistics Canada's (32) definition (population more than 10,000 but density of less than 400 people per km<sup>2</sup>, population less than 10,000 but density of more than 400 people per km<sup>2</sup>, or population less than 10,000 and density of less than 400 people per km<sup>2</sup> (we are revising as per changes in recent census). Two principles will guide the recruitment of participants: participant's characteristics which are susceptible to give rise to different viewpoints (e.g. years of experience, shift work, profession, etc.) and data saturation (33). Respect for representativity of the different types of EDs under study will take precedent over a statistically-based representativity in recruiting all stakeholders. Patient/citizens selection, will follow a research approach that emphasizes public involvement (34). For health care professionals, recruitment will focus on relevant professions/positions best suited to answer our ED specific questions: physicians, nurses, head nurses, administrators, diagnostic technicians, laboratory technicians, psychosocial professionals, pre-hospital emergency professionals. Local media and snowballing will be used for recruitment purposes. In addition, a "champion" will be identified in each rural ED. The criteria for the recruitment of the champions go as follow: 1) the champions

1  
2  
3 must by familiar with the ED and, 2) they may occupy any function as long as they have good  
4  
5 knowledge of the ED and its staff. The champion approach is often used in projects where the  
6  
7 researchers are far away from the study site. Champions are people who know the culture of the  
8  
9 site and its particular concerns (35, 36). They will collaborate with the research team throughout  
10  
11 the project, especially as recruitment facilitators and knowledge brokers.  
12  
13  
14

### 15 16 17 **Data collection:**

#### 18 19 ***Objective 1: Mobilize stakeholders to propose solutions for improving quality and performance*** 20 21 ***in rural EDs*** 22 23 24

25  
26  
27 In the first phase of the project, the multiple stakeholders will be invited to participate in semi-  
28  
29 structured focus groups (37) or individual interviews (38) to discuss potential solutions for  
30  
31 improving accessibility, quality and effectiveness in rural EDs. The interview guide will address  
32  
33 topics relating to the particularities of each rural region (e.g. the health and social care services  
34  
35 available, the current situation of emergency services, the roles of the various emergency  
36  
37 professionals, potential solutions for improving services, and barriers and facilitators to  
38  
39 implementing these solutions).  
40  
41  
42  
43  
44

45  
46 Interviews will be planned as follows: a) ± 40 individual interviews with decision makers at all  
47  
48 levels or the health system: “Ministère de la Santé et des Services sociaux (MSSS)”, regional  
49  
50 health and social care centres, local point of care; b) ± four focus groups (± seven participants  
51  
52 each), one for each profession identified (physicians, nurses, prehospital emergency services,  
53  
54 psychosocial care); c) ± four focus groups with patients and citizens, one for each of the  
55  
56 following categories: patient committee members, mayors, community workers, concerned  
57  
58  
59  
60

1  
2  
3 citizens. The number of interviews will be increased until data saturation is reached. They will be  
4  
5 led by a research professional with experience in qualitative research and will be recorded and  
6  
7 transcribed verbatim.  
8  
9

10  
11  
12 Thematic analysis of data using NVivo software will generate a coding tree (themes and  
13  
14 subthemes) of solutions for improving performance in rural EDs. Qualitative information about  
15  
16 these solutions (context, feasibility) will also be extracted (39). The robustness and clarity of the  
17  
18 categories will also be assessed through discussion with the research team (40).  
19  
20  
21

22  
23  
24 ***Objective 2: Formulate and prioritize recommendations based on solutions identified***  
25  
26

27  
28  
29 In the second phase of the project, the solutions identified through mobilizing stakeholders  
30  
31 (Objective 1) will be submitted to a panel of experts. This panel will formulate consensual  
32  
33 recommendations based on the solutions extracted and will evaluate their feasibility, impacts,  
34  
35 costs and conditions for their implementation. The expert panel ( $\pm 12$ ) will include members of  
36  
37 the research team, academia, university hospitals, professional associations and colleges as well  
38  
39 as our rural champions and partners (41). Selection criteria will be based on peer recognition and  
40  
41 individual credibility. This panel will also establish monitoring indicators for implementing the  
42  
43 recommendations.  
44  
45  
46  
47

48  
49  
50 A two-phase process will be used to establish the consensual recommendations. First, an  
51  
52 anonymous by Email process will be implemented and, second, a nominal face-to-face process  
53  
54 will be used to generate those consensual recommendations.  
55  
56  
57  
58  
59  
60

1  
2  
3 The anonymous by Email process will use a multidimensional analysis grid that will be sent to  
4 the experts so that they will be able to evaluate each of the solutions identified in Phase 1 of the  
5 study. The data collection tool will contain a five-point Likert scale used to rate the solutions and  
6 open-ended spaces to comment on each measure. They will assign a priority to each measure  
7 based on their assessment of, 1) effectiveness, 2) security or negative externalities, 3) costs, 4)  
8 organizational impact (implementation). They will also be asked to comment on the conditions  
9 for its implementation and indicate relevant monitoring indicators. Finally, in order to compare  
10 solutions, the research team in collaboration with the expert panel will determine the weight of  
11 each criteria (e.g. Efficiency 30%, Security 30%, Costs 20%, Organizational impact 20%).  
12  
13  
14  
15  
16  
17  
18  
19  
20  
21  
22  
23  
24  
25  
26

27 Data from this analysis grid will be used to guide discussions during the second face-to-face  
28 nominal process with the experts which will take place in person during a two-day meeting.  
29 Through this nominal process, they will reach a consensus about the priority of the identified  
30 solutions and their feasibility, with help from a facilitator with expertise in consensus activities.  
31 The consensus recommendations (detailed descriptions, priority, feasibility, cost estimates, etc.)  
32 will be compiled in a document that will be the main deliverable at this stage. The document will  
33 also mention other suggestions raised during Phase 1 but that were not part of the final consensus.  
34  
35  
36  
37  
38  
39  
40  
41  
42  
43  
44  
45  
46  
47

48 ***Objective 3: Transfer knowledge of recommendations to improve quality and performance in***  
49 ***rural EDs and support their implementation***  
50  
51  
52

53  
54  
55 In Phase 3, the knowledge translation phase, the consensus recommendations produced in Phase  
56 2 will be transferred to all the stakeholders involved in suggesting solutions and developing  
57  
58  
59  
60

1  
2  
3 recommendations in Phases 1 and 2. A variety of strategies will be implemented to connect with  
4 stakeholders and accompany them in understanding, adapting, and adopting the  
5 recommendations. The possible strategies (conferences, videoconferences, websites, social  
6 media, communities of practice, etc.) will be defined according to the nature of the  
7 recommendations that emerge from the research process and through discussion with our  
8 stakeholders (our partners, site champions, etc.). We will take care to adapt the knowledge,  
9 messages and interventions to the needs of each audience. Our collaborators and co-researchers  
10 will all contribute to accompanying the rural sites depending on the needs expressed in each case,  
11 in a spirit of fostering partnerships between central and remote locations so that each can  
12 understand the situation of the other.  
13  
14  
15  
16  
17  
18  
19  
20  
21  
22  
23  
24  
25  
26  
27  
28

29 ***Objective 4: Assess knowledge transfer and explore further impacts of the participatory action***  
30 ***research project***  
31  
32  
33  
34  
35

36 We will assess the knowledge transfer and implementation in the targeted local sites with a  
37 questionnaire validated beforehand that uses a Likert scale followed by open questions. The  
38 survey will assess a) knowledge of the recommendations; b) implementation of solutions to  
39 address identified barriers and facilitators; c) intention to adopt proposed solutions; d) barriers  
40 and facilitators experienced on site by those implementing the recommendations; and e)  
41 satisfaction with the project/its relevance.  
42  
43  
44  
45  
46  
47  
48  
49  
50  
51  
52

53 This online survey will take place at the end of Phase 3 (Period 0), then again five and eight  
54 months later. This survey will also enable us to measure the extent of stakeholders' participation  
55  
56  
57  
58  
59  
60

1  
2  
3 in the project and retention rates, and to identify characteristics of sites that adopted (or not) some  
4  
5 of the solutions and characteristics of the solutions that had the most impact.  
6  
7

8  
9  
10 The second part of our evaluation will be an exploratory assessment of the impacts of the changes  
11  
12 initiated. Given that adopting recommendations takes time, the real impact of resulting changes  
13  
14 on the performance of EDs could occur later, perhaps outside the project timetable. However, we  
15  
16 will conduct an exploratory quantitative analysis of the associations between adoption of the  
17  
18 recommendations and performance measures in emergency using the indicators determined by  
19  
20 the expert panel in Phase 2. These indicators will be based mostly on those of the MSSS, the  
21  
22 “Direction des soins urgents, de la traumatologie et du continuum clinique (DSUTCC)” and the  
23  
24 Canadian Institute for Health Information, as well as quality of care indicators proposed by  
25  
26 Schull et al. (42), which we validated in earlier studies (43). Some of the recommendations  
27  
28 (training, telemedicine, etc.) may have an immediate impact on certain performance and quality  
29  
30 of care indicators, and these will be measured (e.g. number of transfers, duration of transfers,  
31  
32 treatment of specific conditions, etc.).  
33  
34  
35  
36  
37  
38  
39  
40

### 41 **Discussion and expected results**

42  
43 This study is based on a participatory action research approach that fosters the application of  
44  
45 scientific knowledge in practice and management (44, 45). Our research should therefore result in  
46  
47 relevant recommendations that are likely to be adopted. The recommendations resulting from this  
48  
49 project could be added to a new version of the Quebec emergency management guide (MSSS,  
50  
51 2006) and piloted by the DSUTCC, which is one of the knowledge users in this study. The results  
52  
53 are also eagerly awaited by other emergency medicine associations and representatives in other  
54  
55  
56  
57  
58  
59  
60

1  
2  
3 provinces. This research experience, involving large-scale mobilization, will hopefully serve as a  
4  
5 model for improving performance in all areas of our health and social care system.  
6  
7

8  
9  
10 Finally, we will be contributing to the science of knowledge translation. We will document  
11  
12 knowledge translation strategies that are effective in this context, which is currently a gap in the  
13  
14 literature (46).  
15  
16

### 17 18 19 **Acknowledgements**

20 We wish to thank the rural emergency staff of the province of Québec for participating in our  
21  
22 previous study as well of the “Direction des soins critiques et urgents Ministère de la Santé et des  
23  
24 Services sociaux”. We also wish to thank our collaborators : Denise Trudel, Jean-Guy Trottier,  
25  
26 Dr Alain Tanguay, Mme Hélène Sylvain, Mr. Daniel Paré, Dr Jean Ouellet, Dr Gilles Lortie, Dr  
27  
28 Antoine Groulx, Dr Jean Marc Chauny, Mr. Maxime Laviolette, Mr. Patrice Aubertin, Dr Alex  
29  
30 Pool, Dr Jeff Plant, Mr. Louis Luc Beaudoin, Mr. Jean-François Racine and Mrs Catherine  
31  
32 Turgeon-Pelchat.  
33  
34  
35  
36  
37  
38  
39  
40  
41  
42

### 43 44 **Competing interests and Funding**

45 The authors declare not having any financial or other conflicts of interest related to the  
46  
47 submission. The research project is supported from the "Fonds de Recherche du Québec – Santé  
48  
49 (FRQS) " 32825.  
50  
51  
52  
53  
54  
55  
56  
57  
58  
59  
60



**Authors Contributors:**

RF was responsible for the original idea, literature review and study design. He drafted the initial manuscript and its revised versions. GD, JPF, JG, FL, MO, JP contributed significantly to the manuscript drafting and preparation, revision and formatting the manuscript. RF has contributed to various aspects of the study design with input relating to their specific expertise in the field.

All authors read and approved the final manuscript.

For peer review only

## References

1. Statistics Canada. Population, urban and rural, by province and territory. Available at: <http://www.statcan.gc.ca/tables-tableaux/sumsot/101/cst01/demo62f-eng.htm>. Accessed November 18, 2014.
2. Fleet R, Archambault P, Plant J, Poitras J. Access to emergency care in rural Canada: should we be concerned? *Cjem*. 2013;15(4):191-3.
3. Fleet R, Poitras J, Maltais-Giguere J, Villa J, Archambault P. A descriptive study of access to services in a random sample of Canadian rural emergency departments. *BMJ Open*. 2013;3(11):e003876.
4. Canadian Institute for Health Information. How Healthy Are Rural Canadians? An Assessment of Their Health Status and Health Determinants. Ottawa 2006.
5. Fatovich DM, Jacobs IG. The relationship between remoteness and trauma deaths in Western Australia. *J Trauma*. 2009;67(5):910-4.
6. S L. Rural Canada: Access to health care. Available at: <http://publications.gc.ca/Collection-R/LoPBdP/BP/prb0245-e.htm>. (Accessed September 26, 2014).
7. Peek-Asa C, Zwerling C, Stallones L. Acute traumatic injuries in rural populations. *Am J Public Health*. 2004;94(10):1689-93.
8. Zakrisson T, Ball CG, Kirkpatrick AW. Trauma in Canada: a spirit of equity & collaboration. *World J Surg*. 2013;37(9):2086-93.
9. Gauthier J HJ, Lamarche P, Lévesque JF, Morin D. Entre adaptabilité et fragilité : les conditions d'accès aux services de santé des communautés rurales et éloignées. Institut national de santé publique du Québec 2009.
10. Fleet R, Pelletier C, Marcoux J, Maltais-Giguere J, Archambault P, Audette LD, et al. Differences in access to services in rural emergency departments of Quebec and Ontario. *PLoS One*. 2015;10(4):e0123746.
11. R C. Is regionalization working? *CMAJ*. 2010;182(4):331-2.
12. Fleet R, Plant J, Ness R, Moola S. Patient advocacy by rural emergency physicians after major service cuts: the case of Nelson, BC. *Can J Rural Med*. 2013;18(2):56-61.
13. Romanow RBoV. The Future of Health Care in Canada. [Online, 2002]. Available at: [http://www.ubcmj.com/pdf/ubcmj\\_2\\_2\\_2011\\_7-8.pdf](http://www.ubcmj.com/pdf/ubcmj_2_2_2011_7-8.pdf) (Accessed september 29, 2015).
14. Bilbey N LS. Canadian Health Care: A Focus on Rural Medicine. *UBCMJ*; 2011. Available at: [http://www.ubcmj.com/pdf/ubcmj\\_2\\_2\\_2011\\_7-8.pdf](http://www.ubcmj.com/pdf/ubcmj_2_2_2011_7-8.pdf) (Accessed september 29, 2015).
15. Canadian Association of Emergency Physicians. Recommendations for the management of rural, remote and isolated emergency health care facilities in Canada. 1997. Available at: <http://caep.ca/resources/position-statements-andguidelines/> management-rural-remote-and-isolated-emergency-health-c (Accessed September 26, 2014).
16. Fleet R, Poitras J, Archambault P, Tounkara FK, Chauny JM, Ouimet M, et al. Portrait of rural emergency departments in Quebec and utilization of the provincial emergency department management Guide: cross sectional survey. *BMC Health Serv Res*. 2015;15:572.

17. Ministère De La Santé Et Des Services Sociaux Du Québec. Guide de gestion de l'urgence. Québec: Gouvernement du Québec; 2006.
18. Fleet R, Poitras J. Have we killed the golden hour of trauma? *Ann Emerg Med*. 2011;57(1):73-4; author reply 4-5.
19. Rourke JT, Kennard M. Emergency patient transfers from rural hospitals: a regional study. *Cjem*. 2001;3(4):296-301.
20. Bosk EA, Veinot T, Iwashyna TJ. Which patients and where: a qualitative study of patient transfers from community hospitals. *Med Care*. 2011;49(6):592-8.
21. Hains IM, Marks A, Georgiou A, Westbrook JI. Non-emergency patient transport: what are the quality and safety issues? A systematic review. *Int J Qual Health Care*. 2011;23(1):68-75.
22. Ministère de la santé et des services sociaux. Services préhospitaliers: Urgence d'agir Rapport du Comité national sur les services préhospitaliers d'urgence (2014). Available at: <http://publications.msss.gouv.qc.ca/acrobat/f/documentation/2014/14-929-01W.pdf> (Accessed october 27, 2015).
23. Charash WE, Caputo MP, Clark H, Callas PW, Rogers FB, Crookes BA, et al. Telemedicine to a moving ambulance improves outcome after trauma in simulated patients. *J Trauma*. 2011;71(1):49-54; discussion 5.
24. Waymack JR, Markwell S, Milbrandt JC, Clark TR. Comparison of rates of emergency department procedures and critical diagnoses in metropolitan and rural hospitals. *Rural Remote Health*. 2015;15(4):3298.
25. Drouin MA, Fleet R, Poitras J, Archambault P, Chauny JM, Levesque JF, et al. The Quebec rural emergency department project: a cross-sectional study of a potential two-pronged strategy in the knowledge transfer process. *PLoS One*. 2015;10(4):e0120523.
26. Agha S, Alhamrani AY, Khan MA. Satisfaction of medical students with simulation based learning. *Saudi Med J*. 2015;36(6):731-6.
27. Lateef F. Simulation-based learning: Just like the real thing. *J Emerg Trauma Shock*. 2010;3(4):348-52.
28. Kuan WS, Ibrahim I, Leong BS, Jain S, Lu Q, Cheung YB, et al. Emergency Department Management of Sepsis Patients: A Randomized, Goal-Oriented, Noninvasive Sepsis Trial. *Ann Emerg Med*. 2016;67(3):367-78.e3.
29. Canadian Stroke Best Practice Recommendations. Hyperacute stroke care (2015). Available at: <http://www.strokebestpractices.ca/> (Accessed september 29, 2015).
30. Stewart M, Bledsoe J, Madsen T, Sturges Z, McGuire T, Rayner T, et al. Utilization and Safety of a Pulmonary Embolism Treatment Protocol in an Emergency Department Observation Unit. *Crit Pathw Cardiol*. 2015;14(3):87-9.
31. Smith L RL, Schmidt M. Best practices in the reporting of participatory action research: Embracing both the forest and the trees. *The Counselling Psychologist*. 2010;38(8):1115-1138.
32. Statistique Canada, Definitions of rural. Rural and Small Town Canada Analysis Bulletin. 2001;3(3):1- 17.

- 1
  - 2
  - 3
  - 4
  - 5
  - 6
  - 7
  - 8
  - 9
  - 10
  - 11
  - 12
  - 13
  - 14
  - 15
  - 16
  - 17
  - 18
  - 19
  - 20
  - 21
  - 22
  - 23
  - 24
  - 25
  - 26
  - 27
  - 28
  - 29
  - 30
  - 31
  - 32
  - 33
  - 34
  - 35
  - 36
  - 37
  - 38
  - 39
  - 40
  - 41
  - 42
  - 43
  - 44
  - 45
  - 46
  - 47
  - 48
  - 49
  - 50
  - 51
  - 52
  - 53
  - 54
  - 55
  - 56
  - 57
  - 58
  - 59
  - 60
33. Savoie-Zajc L. Comment peut-on construire un échantillonnage scientifiquement valide? *Recherches Qualitatives*; 2007(5):99-111.
34. Boivin A, Lehoux P, Burgers J, Grol R. What are the key ingredients for effective public involvement in health care improvement and policy decisions? A randomized trial process evaluation. *Milbank Q.* 2014;92(2):319-50.
35. Damschroder LJ, Aron DC, Keith RE, Kirsh SR, Alexander JA, Lowery JC. Fostering implementation of health services research findings into practice: a consolidated framework for advancing implementation science. *Implement Sci.* 2009;4:50.
36. MacDougall C, Fudge E. Planning and recruiting the sample for focus groups and in-depth interviews. *Qual Health Res.* 2001;11(1):117-26.
37. Morgan DLaRAK. *The Focus Group Kit* (six book set). Thousand Oaks, Calif: Sage. 1998.
38. Savoie-Zajc L. L'entrevue semi-dirigée. Dans B. Gauthier (Dir.) : *Recherche sociale : de la problématique à la collecte de données* (5e édition). Québec, Québec : Presses de l'Université du Québec. 2009.
39. Paillé P, & Mucchielli, A. *L'analyse qualitative en sciences humaines et sociales*. Armand Colin. 2012.
40. Thomas D. A General Inductive Approach for Analyzing Qualitative Evaluation Data. 2006; 27 (2): 237-246.
41. Jones J, Hunter D. Consensus methods for medical and health services research. *Bmj.* 1995;311(7001):376-80.
42. Schull MJ HC, Guttman A, Leaver CA, Vermeulen M, Rowe BH, Anderson GM, Zwarenstein M. . Development of a Consensus on Evidence-Based Quality of Care Indicators for Canadian Emergency Departments. ICES Investigative Report. Toronto: Institute for Clinical Evaluative Sciences; 2010.
43. Layani G, Fleet R, Dallaire R, Tounkara FK, Poitras J, Archambault P, et al. The challenges of measuring quality-of-care indicators in rural emergency departments: a cross-sectional descriptive study. *CMAJ Open.* 2016;4(3):E398-e403.
44. Israel BA, Schulz AJ, Parker EA, Becker AB. Review of community-based research: assessing partnership approaches to improve public health. *Annu Rev Public Health.* 1998;19:173-202.
45. Jagosh J, Macaulay AC, Pluye P, Salsberg J, Bush PL, Henderson J, et al. Uncovering the benefits of participatory research: implications of a realist review for health research and practice. *Milbank Q.* 2012;90(2):311-46.
46. Parsons JE, Merlin TL, Taylor JE, Wilkinson D, Hiller JE. Evidence-based practice in rural and remote clinical practice: where is the evidence? *Aust J Rural Health.* 2003;11(5):242-8.

STROBE Statement—Checklist of items that should be included in reports of *cohort studies*

|                              | Item No | Recommendation                                                                                                                                                                                               |
|------------------------------|---------|--------------------------------------------------------------------------------------------------------------------------------------------------------------------------------------------------------------|
| <b>Title and abstract</b>    | 1       | (a) Indicate the study's design with a commonly used term in the title or the abstract<br><i>In the title and in the abstract</i>                                                                            |
|                              |         | (b) Provide in the abstract an informative and balanced summary of what was done and what was found<br><i>The study protocol is defined pages 3 - 4</i>                                                      |
| <b>Introduction</b>          |         |                                                                                                                                                                                                              |
| Background/rationale         | 2       | Explain the scientific background and rationale for the investigation being reported<br><i>Pages 6 - 7</i>                                                                                                   |
| Objectives                   | 3       | State specific objectives, including any prespecified hypotheses<br><i>Page 7</i>                                                                                                                            |
| <b>Methods</b>               |         |                                                                                                                                                                                                              |
| Study design                 | 4       | Present key elements of study design early in the paper<br><i>Page 9</i>                                                                                                                                     |
| Setting                      | 5       | Describe the setting, locations, and relevant dates, including periods of recruitment, exposure, follow-up, and data collection<br><i>Pages 10 - 11</i>                                                      |
| Participants                 | 6       | (a) Give the eligibility criteria, and the sources and methods of selection of participants. Describe methods of follow-up<br><i>Pages 10 - 11</i>                                                           |
|                              |         | (b) For matched studies, give matching criteria and number of exposed and unexposed<br><i>NA (Qualitative study)</i>                                                                                         |
| Variables                    | 7       | Clearly define all outcomes, exposures, predictors, potential confounders, and effect modifiers. Give diagnostic criteria, if applicable<br><i>Pages 11 - 13</i>                                             |
| Data sources/<br>measurement | 8*      | For each variable of interest, give sources of data and details of methods of assessment (measurement). Describe comparability of assessment methods if there is more than one group<br><i>Pages 11 - 12</i> |
| Bias                         | 9       | Describe any efforts to address potential sources of bias<br><i>Pages 12 - 13</i>                                                                                                                            |
| Study size                   | 10      | Explain how the study size was arrived at<br><i>Pages 11 - 13</i>                                                                                                                                            |
| Quantitative variables       | 11      | Explain how quantitative variables were handled in the analyses. If applicable, describe which groupings were chosen and why<br><i>NA</i>                                                                    |
| Statistical methods          | 12      | (a) Describe all statistical methods, including those used to control for confounding<br><i>NA (Qualitative study)</i>                                                                                       |
|                              |         | (b) Describe any methods used to examine subgroups and interactions<br><i>NA (Qualitative study)</i>                                                                                                         |
|                              |         | (c) Explain how missing data were addressed<br><i>NA (Qualitative study)</i>                                                                                                                                 |
|                              |         | (d) If applicable, explain how loss to follow-up was addressed<br><i>NA (Qualitative study)</i>                                                                                                              |
|                              |         | (e) Describe any sensitivity analyses<br><i>NA (Qualitative study)</i>                                                                                                                                       |

| <b>Results</b>           |     |                                                                                                                                                                                                                                              |
|--------------------------|-----|----------------------------------------------------------------------------------------------------------------------------------------------------------------------------------------------------------------------------------------------|
| Participants             | 13* | (a) Report numbers of individuals at each stage of study—eg numbers potentially eligible, examined for eligibility, confirmed eligible, included in the study, completing follow-up, and analysed<br><i>NA (Study protocol)</i>              |
|                          |     | (b) Give reasons for non-participation at each stage<br><i>NA (Study protocol)</i>                                                                                                                                                           |
|                          |     | (c) Consider use of a flow diagram<br><i>NA (Study protocol)</i>                                                                                                                                                                             |
| Descriptive data         | 14* | (a) Give characteristics of study participants (eg demographic, clinical, social) and information on exposures and potential confounders<br><i>NA (Study protocol)</i>                                                                       |
|                          |     | (b) Indicate number of participants with missing data for each variable of interest<br><i>NA (Study protocol)</i>                                                                                                                            |
|                          |     | (c) Summarise follow-up time (eg, average and total amount)<br><i>NA (Study protocol)</i>                                                                                                                                                    |
| Outcome data             | 15* | Report numbers of outcome events or summary measures over time<br><i>NA (Study protocol)</i>                                                                                                                                                 |
| Main results             | 16  | (a) Give unadjusted estimates and, if applicable, confounder-adjusted estimates and their precision (eg, 95% confidence interval). Make clear which confounders were adjusted for and why they were included<br><i>NA (Study protocol)</i>   |
|                          |     | (b) Report category boundaries when continuous variables were categorized<br><i>NA (Study protocol)</i>                                                                                                                                      |
|                          |     | (c) If relevant, consider translating estimates of relative risk into absolute risk for a meaningful time period<br><i>NA (Study protocol)</i>                                                                                               |
| Other analyses           | 17  | Report other analyses done—eg analyses of subgroups and interactions, and sensitivity analyses<br><i>NA (Study protocol)</i>                                                                                                                 |
| <b>Discussion</b>        |     |                                                                                                                                                                                                                                              |
| Key results              | 18  | Summarise key results with reference to study objectives<br><i>NA (Study protocol)</i>                                                                                                                                                       |
| Limitations              | 19  | Discuss limitations of the study, taking into account sources of potential bias or imprecision. Discuss both direction and magnitude of any potential bias<br><i>NA (Study protocol)</i>                                                     |
| Interpretation           | 20  | Give a cautious overall interpretation of results considering objectives, limitations, multiplicity of analyses, results from similar studies, and other relevant evidence<br><i>NA (Study protocol)</i>                                     |
| Generalisability         | 21  | Discuss the generalisability (external validity) of the study results                                                                                                                                                                        |
| <b>Other information</b> |     |                                                                                                                                                                                                                                              |
| Funding                  | 22  | Give the source of funding and the role of the funders for the present study and, if applicable, for the original study on which the present article is based<br><i>NA (Study protocol) This information will be reported in the article</i> |

\*Give information separately for exposed and unexposed groups.

1 **Note:** An Explanation and Elaboration article discusses each checklist item and gives methodological background and  
2 published examples of transparent reporting. The STROBE checklist is best used in conjunction with this article (freely  
3 available on the Web sites of PLoS Medicine at <http://www.plosmedicine.org/>, Annals of Internal Medicine at  
4 <http://www.annals.org/>, and Epidemiology at <http://www.epidem.com/>). Information on the STROBE Initiative is  
5 available at <http://www.strobe-statement.org>.  
6  
7  
8  
9  
10  
11  
12  
13  
14  
15  
16  
17  
18  
19  
20  
21  
22  
23  
24  
25  
26  
27  
28  
29  
30  
31  
32  
33  
34  
35  
36  
37  
38  
39  
40  
41  
42  
43  
44  
45  
46  
47  
48  
49  
50  
51  
52  
53  
54  
55  
56  
57  
58  
59  
60

For peer review only

# BMJ Open

## Rural emergency care 360°: Mobilizing healthcare professionals, decision-makers, patients and citizens to improve rural emergency care in the province of Quebec, Canada: a qualitative study protocol

|                                 |                                                                                                                                                                                                                                                                                                                                                                                                                                                                            |
|---------------------------------|----------------------------------------------------------------------------------------------------------------------------------------------------------------------------------------------------------------------------------------------------------------------------------------------------------------------------------------------------------------------------------------------------------------------------------------------------------------------------|
| Journal:                        | <i>BMJ Open</i>                                                                                                                                                                                                                                                                                                                                                                                                                                                            |
| Manuscript ID                   | bmjopen-2017-016039.R2                                                                                                                                                                                                                                                                                                                                                                                                                                                     |
| Article Type:                   | Protocol                                                                                                                                                                                                                                                                                                                                                                                                                                                                   |
| Date Submitted by the Author:   | 09-Jun-2017                                                                                                                                                                                                                                                                                                                                                                                                                                                                |
| Complete List of Authors:       | Fleet, Richard; Université Laval, Département de médecine familiale et de médecine d'urgence<br>Dupuis, Gilles; Université du Québec à Montréal,<br>Fortin, Jean-Paul; Centre intégré universitaire de santé et de services sociaux de la Capitale-Nationale<br>Gravel, Jocelyn; SainteJustine Hospital, Emergency<br>Ouimet, Mathieu; University of Laval, Political Science<br>Poitras, Julien; Université Laval,<br>Legare, France; CHU de Quebec and Université Laval, |
| <b>Primary Subject Heading</b>: | Emergency medicine                                                                                                                                                                                                                                                                                                                                                                                                                                                         |
| Secondary Subject Heading:      | Health services research, Medical management, Qualitative research                                                                                                                                                                                                                                                                                                                                                                                                         |
| Keywords:                       | Rural emergency departments,, Health care, Performance, Unwarranted variations in practice                                                                                                                                                                                                                                                                                                                                                                                 |
|                                 |                                                                                                                                                                                                                                                                                                                                                                                                                                                                            |

SCHOLARONE™  
Manuscripts



1  
2  
3 **Rural emergency care 360°: Mobilizing healthcare professionals, decision-makers, patients**  
4 **and citizens to improve rural emergency care in the province of Quebec, Canada: a**  
5 **qualitative study protocol**  
6  
7  
8  
9

10  
11  
12  
13  
14  
15 **Richard Fleet, MD, PhD<sup>1,2</sup>, Gilles Dupuis, PhD<sup>3</sup>, Jean-Paul Fortin, MD<sup>4</sup>, Jocelyn Gravel,**  
16 **MD, MSc<sup>5</sup>, Mathieu Ouimet, PhD<sup>6</sup>, Julien Poitras, MD<sup>1,2</sup>, France Légaré, MD, PhD<sup>7</sup>**  
17  
18  
19  
20  
21  
22  
23

24 <sup>1</sup>Department of Family and Emergency Medicine, Université Laval, Quebec, QC, Canada;

25  
26  
27 <sup>2</sup>Research Chair in Emergency Medicine, CHAU-Hôtel-Dieu de Lévis (Université Laval); Lévis,  
28  
29  
30  
31  
32  
33  
34  
35  
36  
37  
38  
39  
40  
41  
42  
43  
44  
45  
46  
47  
48  
49  
50  
51  
52  
53  
54  
55  
56  
57  
58  
59  
60

QC, Canada;

<sup>3</sup>Department of Psychology, Université du Québec à Montréal, Montreal, QC, Canada ;

<sup>4</sup>Centre intégré universitaire de santé et de services sociaux de la Capitale-Nationale, Québec,  
Canada ;

<sup>5</sup>CHU Sainte-Justine, Université de Montréal, Montréal, Canada ;

<sup>6</sup>Department of Political Science, Université Laval, Quebec, QC, Canada;

<sup>7</sup>Department of Family Medicine and Emergency Medicine, Knowledge Transfer and Health  
Technology Assessment Group of the CHU de Québec Research Centre, Unité de Recherche  
Évaluative, Université Laval, Quebec, QC, Canada.

**Corresponding author:** Dr. Richard Fleet; CSSS Alphonse-Desjardins Research Centre, Hôtel-  
Dieu de Lévis, 143 Wolfe Street, Lévis, QC, Canada, G6V 3Z1. Phone: +1 418-835-7121 ext.  
3173; Fax: +1 418-835-7276; Email: [rfleet@videotron.ca](mailto:rfleet@videotron.ca)

1  
2  
3  
4  
5  
6  
7  
8  
9  
10  
11  
12  
13  
14  
15  
16  
17  
18  
19  
20  
21  
22  
23  
24  
25  
26  
27  
28  
29  
30  
31  
32  
33  
34  
35  
36  
37  
38  
39  
40  
41  
42  
43  
44  
45  
46  
47  
48  
49  
50  
51  
52  
53  
54  
55  
56  
57  
58  
59  
60

For peer review only

**Abstract:**

**Introduction:** Emergency departments (EDs) are an important safety net for rural populations. Results of our earlier studies suggest that rural Canadian hospitals have limited access to advanced imaging services and intensive care Units (ICUs) and that patients are transferred over large distances. They also revealed significant geographical variations in rural services. In the absence of national standards, our studies raise questions about inequities in rural access to emergency services and the risks for citizens. Our goal is to build recommendations for improving services by mobilizing stakeholders interested in rural emergency care. With help and full engagement of stakeholders, we will 1) identify solutions for improving quality and performance in rural emergency departments; 2) formulate and prioritize recommendations; 3) transfer knowledge of the recommendations to rural emergency departments and support operationalization; 4) assess knowledge transfer and explore further impacts of this participatory action research project.

**Methodology:** We will use a participatory action research approach. We will plan for a governance structure that includes all stakeholders' representatives so throughout this project, stakeholders are fully engaged at every step. Our sample will be 26 emergency departments in rural Quebec. We will conduct semi-structured individual and focus group interviews with relevant and representative participants, including patients and citizens (estimated N=200). Interviews will be thematically analyzed to extract potential solutions and other qualitative information.

An expert panel ( $\pm 15$ ) will use an analysis grid to develop consensus recommendations from solutions suggested and will evaluate feasibility, impacts, costs, conditions for implementation,

1  
2  
3 and establish monitoring indicators. Recommendations will be transferred to stakeholders using  
4  
5 tailored knowledge translation strategies (web platform, meetings, etc.).  
6  
7  
8  
9

10 **Discussion and expected results:** This study will result in a comprehensive consensus list of  
11  
12 feasible and high-priority recommendations enabling decision-makers in emergency care to  
13  
14 implement improvements in rural emergency care in Quebec.  
15  
16  
17  
18  
19

20 **Ethics and dissemination:** This protocol has been approved by the CSSS Alphonse-Desjardins  
21  
22 research ethics committee (Project number: MP 2017 - 009). The qualitative material will be kept  
23  
24 confidential and the data will be presented in a way that respects confidentiality. The  
25  
26 dissemination plan for the study includes publications in scientific and professional journals. We  
27  
28 will also use social media to disseminate our findings and activities such as communications in  
29  
30 public conferences.  
31  
32  
33  
34  
35  
36

37 **Strengths of this study:**

- 38 • First research project to mobilize a diverse group of stakeholders to find solutions for  
39  
40 improving care and services in Quebec rural emergency departments;  
41  
42
- 43 • Consensus on a comprehensive list of feasible and high-priority recommendations for  
44  
45 improving the performance of Quebec rural emergency departments;  
46  
47
- 48 • Recommendations will be immediately applicable and we will explore their impact by  
49  
50 evaluating and monitoring this knowledge mobilization initiative.  
51  
52  
53  
54  
55  
56  
57  
58  
59  
60

**Methodological limitation:**

- Participant selection not –randomized but theoretically representative;
- Interviews and committee participation is time-consuming and participants with busy schedules may decline participation or may not continue to the end of the study.

**Word count:** Abstract 295; Main text 2912

**Keywords:** Rural emergency departments, Health care, Performance, Unwarranted variations in practice, Participatory action research

## Introduction

Providing high-quality emergency care in rural areas poses specific challenges that are understudied. Rural emergency departments (EDs) treat four million patients per year in Canada, representing 30% of all emergency consultations, while those living in rural areas are only 20% of the whole population (1-3). Compared with urban populations, rural populations are older, in poorer health, and more at risk of injury (4-8). Rural EDs represent an important safety net for rural populations, especially in contexts where there are few alternatives to hospital emergency services, many people are without a family doctor, and recruiting and retaining physicians is difficult (9). Our previous work showed that access to care and services varies from one part of Canada to another (rural/urban, rural/rural) (3, 10). In fact, 74% of rural EDs in Quebec have 24/7 access to a general surgeon, ICU and CT scans, elsewhere in the country fewer than 20% of EDs have access to these services (3, 10). These variations in access to care suggest inequities in accessibility, quality and effectiveness of ED care and services across rural and urban EDs and raise questions about Canada's universal healthcare system. Moreover, in the past decade a wave of centralization of healthcare services has taken place, largely because of budgetary constraints and a shortage of medical personnel. This has led to a reduction of services in rural areas and the closure of several small community hospitals, contributing to the wide variations in practice observed today (2, 11, 12). In the present context of growing needs and limited resources, policy-makers are reviewing emergency services and their place in the continuum of care. Policy-makers need evidence to inform their choices about allocation of emergency care and services for vulnerable populations in remote areas (2, 13, 14). In 1997, the Canadian Association of Emergency Physicians (CAEP) made several recommendations about improving medical practice in rural EDs across the country (15). However, the field of emergency medicine has evolved

1  
2  
3 significantly over the past 15 years (16), and an update of these recommendations that is based on  
4  
5 recent evidence is needed.  
6  
7  
8  
9

10 The Quebec Ministry of Health and Social Services (MSSS) published an ED management guide  
11 (Guide de gestion de l'urgence, 2000, updated 2006) (17), but it is clear that its use is not  
12 widespread in rural EDs (16). In spite of appeals for change, there is thus an urgent need for  
13 standards for rural EDs that managers of these EDs can turn to (2, 12, 13).  
14  
15  
16  
17  
18  
19  
20  
21

22 The main objective of this innovative participatory action research project is therefore to address  
23 these practice variations and the absence of standards applied in the context of Quebec's rural  
24 EDs. In collaboration with more than 200 rural emergency stakeholders and citizens, we plan to  
25 co-produce recommendations for improving the performance of EDs that are both evidence-based  
26 and respectful of the constraints of real world concerns. We use the MSSS definition of  
27 performance which includes access, quality and optimisation dimensions. This definition is in  
28 accordance with the conceptual framework and the needs of the majority of the stakeholders of  
29 the research who are members of the Québec Health System (18). Collaboration among  
30 stakeholders will identify promising interventions, especially in the continuum of care, based on  
31 best evidence and on best practices in similar situations. This process will bring existing solutions  
32 to light and adapt them to the realities of rural contexts, increasing likelihood of the  
33 implementation of the recommendations. We use the knowledge transfer (KT) framework  
34 developed by the National Public Health Institute of Québec (19) which allows us to focus on the  
35 different steps from coproduction to use of knowledge. It also highlights the multiple KT  
36 strategies from dissemination to appropriation of knowledge. This framework justifies the  
37  
38  
39  
40  
41  
42  
43  
44  
45  
46  
47  
48  
49  
50  
51  
52  
53  
54  
55  
56  
57  
58  
59  
60

1  
2  
3 participatory research approach used in this project and gives us guidelines to evaluate the KT  
4  
5  
6 process.  
7  
8  
9

### 10 **Potentials solutions for improving accessibility, quality and effectiveness of rural EDs**

11  
12 Through our literature review and the results of our earlier research, the expertise of our  
13 multidisciplinary team and the experience of our partners we have already identified the  
14 following solutions that could improve accessibility, quality and cost-effectiveness in rural  
15 emergency care and services: improvement of emergency prehospital care (e.g. optimization of  
16 transfers); use of new technologies (e.g. telemedicine, Point of Care Ultrasound (POCUS));  
17 optimal use of resources (e.g. access to medical specialists and facilities); training (e.g.  
18 simulation-based learning) and improved management procedures (e.g. facilitating the  
19 implementation of the ED management guide (“Guide de gestion de l’urgence”); standardize  
20 databases for better measurement of quality indicators). These solutions will be proposed to  
21 participants of our study in order to validate the potential usefulness and applicability.  
22  
23  
24  
25  
26  
27  
28  
29  
30  
31  
32  
33  
34  
35  
36  
37  
38

### 39 **Improving emergency prehospital care using remote monitoring**

40  
41 The distances between tertiary care hospitals and rural residents limit their access to specialist  
42 services and facilities. Our data suggests that most rural EDs are more than 300 km from tertiary  
43 and secondary care trauma units, and an average of 300 inter-hospital transfers are required per  
44 year in each rural ED (3, 16). The quality of emergency care in rural areas thus depends on the  
45 capacity to perform procedures locally and transfer patients who require it to the nearest referral  
46 centre after stabilizing them (20, 21). This process must be both timely and safe. Inter-hospital  
47 transfers, however, are expensive and expose patients to complications (e.g. road accidents) (22,  
48 23). Moreover, many patients who are in pain or have not been stabilized require a medical or  
49  
50  
51  
52  
53  
54  
55  
56  
57  
58  
59  
60



1  
2  
3 nursing escort, which can cause staff shortages in the emergency room and is very expensive  
4  
5 (24). One promising solution is prehospital remote monitoring, whereby ambulance personnel  
6  
7 and nurses can be supported from a distance (25).  
8  
9

### 10 11 12 **Training medical personnel**

13  
14 Compare to emergency medicine professionals in urban areas, those in rural areas are  
15  
16 proportionally less exposed to various medical situations, including managing trauma related  
17  
18 injuries (26), and other serious clinical conditions. In addition, according to our data, one third of  
19  
20 rural physicians have less than five years of practice experience and only 6% have had extra  
21  
22 emergency medicine training – CCFP (EM) Canadian College of Family Medicine certification  
23  
24 of special competency in emergency medicine (total of 3 years post-graduate (MD) training), or  
25  
26 Fellowship of the Royal College of Physicians speciality in emergency medicine (FRCP) (5 years  
27  
28 post-graduate (MD) training. Rural physicians are requesting additional training (27). Simulation-  
29  
30 based learning or clinical immersion programs are promising innovations in medical education  
31  
32 that could meet the educational needs of rural emergency physicians (28, 29).  
33  
34  
35  
36  
37  
38  
39  
40

### 41 **Quality improvement through standardization**

42  
43 The use of care protocols or guidelines in treating some emergency conditions, such as sepsis  
44  
45 (30), strokes (31), cardiovascular problems as well as trauma could improve the quality of care  
46  
47 (30, 32). This would be a relevant and evidence-based approach to reducing practice variations.  
48  
49 However, the actual use of care protocols in both rural and urban contexts and their respective  
50  
51 impacts on patient-care and health are unknown.  
52  
53  
54  
55  
56  
57  
58  
59  
60

## Objectives

The main objectives of this study are therefore to:

- 1) Identify solutions for improving quality and performance in rural emergency departments by mobilizing stakeholders (decision-makers, professionals, patients and citizens);
- 2) Formulate and prioritize recommendations based on solutions identified;
- 3) Transfer knowledge of recommendations to improve quality and performance in rural EDs and support the implementation of the recommendations and identified solutions;
- 4) Assess knowledge transfer and explore further impacts of the participatory action research project.

## Methodology

We chose to use a participatory action research approach for this multipronged project (33). Our hypothesis is that this process of knowledge co-construction will facilitate implementation of the recommendations.

## Selection of EDs and study participants

Participating rural EDs will mostly be the same as in our earlier projects and represent 100% of Quebec rural EDs (N=26). Ongoing changes, including mergers, in the Quebec hospital system may slightly affect our selection criteria at the time of the study's onset. Briefly, these are hospitals that offer 24/7 emergency coverage, including inpatient beds, and are situated in "rural or small towns" according to the Statistics Canada's (34) definition (population more than 10,000 but density of less than 400 people per km<sup>2</sup>, population less than 10,000 but density of more than 400 people per km<sup>2</sup>, or population less than 10,000 and density of less than 400 people per km<sup>2</sup> (we are revising as per changes in recent census). Two principles will guide the recruitment of

1  
2  
3 participants: participant's characteristics which are susceptible to give rise to different viewpoints  
4 (e.g. years of experience, shift work, profession, etc.) and data saturation (35). Respect for  
5  
6 representativity of the different types of EDs under study will take precedent over a statistically-  
7  
8 based representativity in recruiting all stakeholders. Patient/citizens selection, will follow a  
9  
10 research approach that emphasizes public involvement (36). For health care professionals,  
11  
12 recruitment will focus on relevant professions/positions best suited to answer our ED specific  
13  
14 questions: physicians, nurses, head nurses, administrators, diagnostic technicians, laboratory  
15  
16 technicians, psychosocial professionals, pre-hospital emergency professionals. Local media and  
17  
18 snowballing will be used for recruitment purposes. In addition, a "champion" will be identified in  
19  
20 each rural ED. The criteria for the recruitment of the champions go as follow: 1) the champions  
21  
22 must by familiar with the ED and, 2) they may occupy any function as long as they have good  
23  
24 knowledge of the ED and its staff. The champion approach is often used in projects where the  
25  
26 researchers are far away from the study site. Champions are people who know the culture of the  
27  
28 site and its particular concerns (37, 38). They will collaborate with the research team throughout  
29  
30 the project, especially as recruitment facilitators and knowledge brokers.  
31  
32  
33  
34  
35  
36  
37  
38  
39  
40

#### 41 **Data collection:**

#### 42 43 ***Objective 1: Mobilize stakeholders to propose solutions for improving quality and performance*** 44 45 ***in rural EDs*** 46 47 48 49

50  
51 In the first phase of the project, the multiple stakeholders will be invited to participate in semi-  
52  
53 structured focus groups (39) or individual interviews (40) to discuss potential solutions for  
54  
55 improving accessibility, quality and effectiveness in rural EDs. The interview guide will address  
56  
57 topics relating to the particularities of each rural region (e.g. the health and social care services  
58  
59  
60

1  
2  
3 available, the current situation of emergency services, the roles of the various emergency  
4 professionals, potential solutions for improving services, and barriers and facilitators to  
5 implementing these solutions).  
6  
7  
8  
9

10  
11  
12 Interviews will be planned as follows: a)  $\pm$  40 individual interviews with decision makers at all  
13 levels or the health system: “Ministère de la Santé et des Services sociaux (MSSS)”, regional  
14 health and social care centres, local point of care; b)  $\pm$  four focus groups ( $\pm$  seven participants  
15 each), one for each profession identified (physicians, nurses, prehospital emergency services,  
16 psychosocial care); c)  $\pm$  four focus groups with patients and citizens, one for each of the  
17 following categories: patient committee members, mayors, community workers, concerned  
18 citizens. The number of interviews will be increased until data saturation is reached. They will be  
19 led by a research professional with experience in qualitative research and will be recorded and  
20 transcribed verbatim.  
21  
22  
23  
24  
25  
26  
27  
28  
29  
30  
31  
32  
33  
34  
35

36 Thematic analysis of data using NVivo software will generate a coding tree (themes and  
37 subthemes) of solutions for improving performance in rural EDs. Qualitative information about  
38 these solutions (context, feasibility) will also be extracted (41). The robustness and clarity of the  
39 categories will also be assessed through discussion with the research team (42). We will provide  
40 the COREQ checklist for the reporting of qualitative studies with the manuscript that will present  
41 the qualitative results.  
42  
43  
44  
45  
46  
47  
48  
49  
50  
51  
52

### 53 ***Objective 2: Formulate and prioritize recommendations based on solutions identified***

54  
55 In the second phase of the project, the solutions identified through mobilizing stakeholders  
56 (Objective 1) will be submitted to a panel of experts. This panel will formulate consensual  
57  
58  
59  
60

1  
2  
3 recommendations based on the solutions extracted and will evaluate their feasibility, impacts,  
4 costs and conditions for their implementation. The expert panel ( $\pm 12$ ) will include members of  
5 the research team, academia, university hospitals, professional associations and colleges as well  
6 as our rural champions and partners (43). Selection criteria will be based on peer recognition and  
7 individual credibility. This panel will also establish monitoring indicators for implementing the  
8 recommendations.  
9

10  
11  
12  
13  
14  
15  
16  
17  
18  
19  
20 A two-phase process will be used to establish the consensual recommendations. First, an  
21 anonymous by Email process will be implemented and, second, a nominal face-to-face process  
22 will be used to generate those consensual recommendations.  
23  
24  
25  
26  
27

28  
29 The anonymous by Email process will use a multidimensional analysis grid that will be sent to  
30 the experts so that they will be able to evaluate each of the solutions identified in Phase 1 of the  
31 study. The data collection tool will contain a five-point Likert scale used to rate the solutions and  
32 open-ended spaces to comment on each measure. They will assign a priority to each measure  
33 based on their assessment of, 1) effectiveness, 2) security or negative externalities, 3) costs, 4)  
34 organizational impact (implementation). They will also be asked to comment on the conditions  
35 for its implementation and indicate relevant monitoring indicators. Finally, in order to compare  
36 solutions, the research team in collaboration with the expert panel will determine the weight of  
37 each criteria (e.g. Efficiency 30%, Security 30%, Costs 20%, Organizational impact 20%).  
38  
39  
40  
41  
42  
43  
44  
45  
46  
47  
48  
49  
50

51  
52  
53 Data from this analysis grid will be used to guide discussions during the second face-to-face  
54 nominal process with the experts which will take place in person during a two-day meeting.  
55 Through this nominal process, they will reach a consensus about the priority of the identified  
56  
57  
58  
59  
60

1  
2  
3 solutions and their feasibility, with help from a facilitator with expertise in consensus activities.  
4  
5 The consensus recommendations (detailed descriptions, priority, feasibility, cost estimates, etc.)  
6  
7 will be compiled in a document that will be the main deliverable at this stage. The document will  
8  
9 also mention other suggestions raised during Phase 1 but that were not part of the final consensus.  
10  
11

12  
13  
14  
15 ***Objective 3: Transfer recommendations to improve quality and performance in rural EDs and***  
16  
17 ***support their implementation***  
18

19  
20 In Phase 3, the consensus recommendations produced in Phase 2 will be presented to all  
21  
22 stakeholders involved in Phases 1 and 2 and to others stakeholders from the EDs involved in the  
23  
24 research. A variety of strategies will be implemented to connect with stakeholders and  
25  
26 accompany them in understanding, adapting, and, eventually, adopting the recommendations. The  
27  
28 possible strategies (conferences, videoconferences, websites, social media, communities of  
29  
30 practice, etc.) will be defined according to the nature of the recommendations that emerge from  
31  
32 the research process and through discussions with the stakeholders (our partners, site champions,  
33  
34 etc.). As researchers, we will have a key role in coproducing, presenting and adapting the  
35  
36 knowledge. We will also support the reception, adoption and appropriation of knowledge by  
37  
38 acting as a networking hub for participating EDs and members of our expert panel and by  
39  
40 suggesting tools to implement some solutions. Our collaborators and co-researchers will all  
41  
42 contribute to accompany the rural sites depending of the needs expressed in each case, in a spirit  
43  
44 of fostering partnership between central and remote locations so that each can understand the  
45  
46 situation of the others.  
47  
48  
49  
50  
51  
52  
53  
54  
55  
56  
57  
58  
59  
60

1  
2  
3 ***Objective 4: Assess knowledge transfer and explore further impacts of the participatory action***  
4  
5 ***research project***  
6

7  
8 We will assess the knowledge transfer and implementation in the targeted local sites with a  
9  
10 questionnaire validated beforehand that uses a Likert scale followed by open questions. The  
11  
12 survey will assess a) knowledge of the recommendations; b) implementation of solutions to  
13  
14 address identified barriers and facilitators; c) intention to adopt proposed solutions; d) barriers  
15  
16 and facilitators experienced on site by those implementing the recommendations; and e)  
17  
18 satisfaction with the project/its relevance.  
19  
20

21  
22  
23  
24 This online survey will take place at the end of Phase 3 (Period 0), then again five and eight  
25  
26 months later. This survey will also enable us to measure the extent of stakeholders' participation  
27  
28 in the project and retention rates, and to identify characteristics of sites that adopted (or not) some  
29  
30 of the solutions and characteristics of the solutions that had the most impact.  
31  
32

33  
34  
35  
36 The second part of our evaluation will be an exploratory assessment of the impacts of the changes  
37  
38 initiated. Given that adopting recommendations takes time, the real impact of resulting changes  
39  
40 on the performance of EDs could occur later, perhaps outside the project timetable. However, we  
41  
42 will conduct an exploratory quantitative analysis of the associations between adoption of the  
43  
44 recommendations and performance measures in emergency using the indicators determined by  
45  
46 the expert panel in Phase 2. These indicators will be based mostly on those of the MSSS, the  
47  
48 "Direction des soins urgents, de la traumatologie et du continuum clinique (DSUTCC)" and the  
49  
50 Canadian Institute for Health Information, as well as quality of care indicators proposed by  
51  
52 Schull et al. (44), which we validated in earlier studies (45). Some of the recommendations  
53  
54 (training, telemedicine, etc.) may have an immediate impact on certain performance and quality  
55  
56  
57  
58  
59  
60

1  
2  
3 of care indicators, and these will be measured (e.g. number of transfers, duration of transfers,  
4  
5 treatment of specific conditions, etc.).  
6  
7  
8  
9

### 10 **Discussion and expected results**

11  
12 This study is based on a participatory action research approach that fosters the application of  
13 scientific knowledge in practice and management (46, 47). Our research should therefore result in  
14 relevant recommendations that are likely to be adopted. The recommendations resulting from this  
15 project could be added to a new version of the Quebec emergency management guide (MSSS,  
16 2006) and piloted by the DSUTCC, which is one of the knowledge users in this study. The results  
17 are also eagerly awaited by other emergency medicine associations and representatives in other  
18 provinces. This research experience, involving large-scale mobilization, will hopefully serve as a  
19 model for improving performance in all areas of our health and social care system.  
20  
21  
22  
23  
24  
25  
26  
27  
28  
29  
30  
31

32  
33  
34 Finally, we will be contributing to the science of knowledge translation. We will document  
35 knowledge translation strategies that are effective in this context, which is currently a gap in the  
36 literature (48).  
37  
38  
39  
40  
41  
42

### 43 **Acknowledgements**

44  
45 We wish to thank the rural emergency staff of the province of Québec for participating in our  
46 previous study as well of the “Direction des soins critiques et urgents Ministère de la Santé et des  
47 Services sociaux”. We also wish to thank our collaborators: Denise Trudel, Jean-Guy Trottier, Dr  
48 Alain Tanguay, Mme Hélène Sylvain, Mr. Daniel Paré, Dr Jean Ouellet, Dr Gilles Lortie, Dr  
49 Antoine Groulx, Dr Jean Marc Chauny, Mr. Maxime Laviolette, Mr. Patrice Aubertin, Dr Alex  
50  
51  
52  
53  
54  
55  
56  
57  
58  
59  
60



1  
2  
3 Pool, Dr Jeff Plant, Mr. Louis Luc Beaudoin, Mr. Jean-François Racine and Mrs Catherine  
4  
5 Turgeon-Pelchat.  
6  
7  
8  
9

### 10 **Competing interests and Funding**

11  
12 The authors declare not having any financial or other conflicts of interest related to the  
13 submission. The research project is supported from the "Fonds de Recherche du Québec – Santé  
14 (FRQS) " 32825.  
15  
16  
17  
18  
19

### 20 **Authors Contributors:**

21  
22 RF was responsible for the original idea, literature review and study design. He drafted the initial  
23 manuscript and its revised versions. GD, JPF, JG, FL, MO, JP contributed significantly to the  
24 manuscript drafting and preparation, revision and formatting the manuscript. RF has contributed  
25 to various aspects of the study design with input relating to their specific expertise in the field.  
26  
27  
28  
29  
30  
31  
32 All authors read and approved the final manuscript.  
33  
34  
35  
36  
37  
38  
39  
40  
41  
42  
43  
44  
45  
46  
47  
48  
49  
50  
51  
52  
53  
54  
55  
56  
57  
58  
59  
60

## References

1. Statistics Canada. Population, urban and rural, by province and territory. Available at: <http://www.statcan.gc.ca/tables-tableaux/sumsoms/101/cst01/demo62f-eng.htm>. Accessed November 18, 2014.
2. Fleet R, Archambault P, Plant J, Poitras J. Access to emergency care in rural Canada: should we be concerned? *Cjem*. 2013;15(4):191-3.
3. Fleet R, Poitras J, Maltais-Giguere J, Villa J, Archambault P. A descriptive study of access to services in a random sample of Canadian rural emergency departments. *BMJ Open*. 2013;3(11):e003876.
4. Canadian Institute for Health Information. How Healthy Are Rural Canadians? An Assessment of Their Health Status and Health Determinants. Ottawa 2006.
5. Fatovich DM, Jacobs IG. The relationship between remoteness and trauma deaths in Western Australia. *J Trauma*. 2009;67(5):910-4.
6. S L. Rural Canada: Access to health care. Available at: <http://publications.gc.ca/Collection-R/LoPBdP/BP/prb0245-e.htm>. (Accessed September 26, 2014).
7. Peek-Asa C, Zwerling C, Stallones L. Acute traumatic injuries in rural populations. *Am J Public Health*. 2004;94(10):1689-93.
8. Zakrisson T, Ball CG, Kirkpatrick AW. Trauma in Canada: a spirit of equity & collaboration. *World J Surg*. 2013;37(9):2086-93.
9. Gauthier J HJ, Lamarche P, Lévesque JF, Morin D. Entre adaptabilité et fragilité : les conditions d'accès aux services de santé des communautés rurales et éloignées. Institut national de santé publique du Québec 2009.
10. Fleet R, Pelletier C, Marcoux J, Maltais-Giguere J, Archambault P, Audette LD, et al. Differences in access to services in rural emergency departments of Quebec and Ontario. *PLoS One*. 2015;10(4):e0123746.
11. R C. Is regionalization working? *CMAJ*. 2010;182(4):331-2.
12. Fleet R, Plant J, Ness R, Moola S. Patient advocacy by rural emergency physicians after major service cuts: the case of Nelson, BC. *Can J Rural Med*. 2013;18(2):56-61.
13. Romanow RBoV. The Future of Health Care in Canada. [Online, 2002]. Available at: [http://www.ubcmj.com/pdf/ubcmj\\_2\\_2\\_2011\\_7-8.pdf](http://www.ubcmj.com/pdf/ubcmj_2_2_2011_7-8.pdf) (Accessed september 29, 2015).
14. Bilbey N LS. Canadian Health Care: A Focus on Rural Medicine. *UBCMJ*; 2011. Available at: [http://www.ubcmj.com/pdf/ubcmj\\_2\\_2\\_2011\\_7-8.pdf](http://www.ubcmj.com/pdf/ubcmj_2_2_2011_7-8.pdf) (Accessed september 29, 2015).

- 1  
2  
3 15. Canadian Association of Emergency Physicians. Recommendations for the management of  
4 rural, remote and isolated emergency health care facilities in Canada. 1997. Available at:  
5 <http://caep.ca/resources/position-statements-andguidelines/> management-rural-remote-and-  
6 isolated-emergency-health-c (Accesse September 26, 2014).  
7  
8
- 9 16. Fleet R, Poitras J, Archambault P, Tounkara FK, Chauny JM, Ouimet M, et al. Portrait of  
10 rural emergency departments in Quebec and utilization of the provincial emergency  
11 department management Guide: cross sectional survey. BMC Health Serv Res.  
12 2015;15:572.  
13
- 14 17. Ministère de la Santé et des Services sociaux du Québec. Guide de gestion de l'urgence.  
15 Québec: Gouvernement du Québec; 2006.  
16  
17
- 18 18. Ministère de la Santé et des Services sociaux du Québec. Cadre de référence ministériel  
19 d'évaluation de la performance du système public de santé et de services sociaux à des fins  
20 de gestion. 2012:25 pages.  
21
- 22 19. Institut national de santé publique du Québec. Animer un processus de transfert des  
23 connaissances : bilan des connaissances et outil d'animation. 2009.  
24  
25
- 26 20. Fleet R, Poitras J. Have we killed the golden hour of trauma? Ann Emerg Med.  
27 2011;57(1):73-4; author reply 4-5.  
28
- 29 21. Rourke JT, Kennard M. Emergency patient transfers from rural hospitals: a regional study.  
30 Cjem. 2001;3(4):296-301.  
31  
32
- 33 22. Bosk EA, Veinot T, Iwashyna TJ. Which patients and where: a qualitative study of patient  
34 transfers from community hospitals. Med Care. 2011;49(6):592-8.  
35
- 36 23. Hains IM, Marks A, Georgiou A, Westbrook JI. Non-emergency patient transport: what are  
37 the quality and safety issues? A systematic review. Int J Qual Health Care. 2011;23(1):68-  
38 75.  
39
- 40 24. Ministère de la Santé et des Services sociaux. Services préhospitaliers: Urgence d'agir  
41 Rapport du Comité national sur les services préhospitaliers d'urgence (2014). Available at:  
42 <http://publications.msss.gouv.qc.ca/acrobat/f/documentation/2014/14-929-01W.pdf>  
43 (Accessed october 27, 2015).  
44  
45
- 46 25. Charash WE, Caputo MP, Clark H, Callas PW, Rogers FB, Crookes BA, et al.  
47 Telemedicine to a moving ambulance improves outcome after trauma in simulated patients.  
48 J Trauma. 2011;71(1):49-54; discussion 5.  
49  
50
- 51 26. Waymack JR, Markwell S, Milbrandt JC, Clark TR. Comparison of rates of emergency  
52 department procedures and critical diagnoses in metropolitan and rural hospitals. Rural  
53 Remote Health. 2015;15(4):3298.  
54  
55  
56  
57  
58  
59  
60

- 1  
2  
3  
4  
5  
6  
7  
8  
9  
10  
11  
12  
13  
14  
15  
16  
17  
18  
19  
20  
21  
22  
23  
24  
25  
26  
27  
28  
29  
30  
31  
32  
33  
34  
35  
36  
37  
38  
39  
40  
41  
42  
43  
44  
45  
46  
47  
48  
49  
50  
51  
52  
53  
54  
55  
56  
57  
58  
59  
60
27. Drouin MA, Fleet R, Poitras J, Archambault P, Chauny JM, Levesque JF, et al. The Quebec rural emergency department project: a cross-sectional study of a potential two-pronged strategy in the knowledge transfer process. *PLoS One*. 2015;10(4):e0120523.
  28. Agha S, Alhamrani AY, Khan MA. Satisfaction of medical students with simulation based learning. *Saudi Med J*. 2015;36(6):731-6.
  29. Lateef F. Simulation-based learning: Just like the real thing. *J Emerg Trauma Shock*. 2010;3(4):348-52.
  30. Kuan WS, Ibrahim I, Leong BS, Jain S, Lu Q, Cheung YB, et al. Emergency Department Management of Sepsis Patients: A Randomized, Goal-Oriented, Noninvasive Sepsis Trial. *Ann Emerg Med*. 2016;67(3):367-78.e3.
  31. Canadian Stroke Best Practice Recommendations. Hyperacute stroke care (2015). Available at: <http://www.strokebestpractices.ca/> (Accessed september 29, 2015).
  32. Stewart M, Bledsoe J, Madsen T, Sturges Z, McGuire T, Rayner T, et al. Utilization and Safety of a Pulmonary Embolism Treatment Protocol in an Emergency Department Observation Unit. *Crit Pathw Cardiol*. 2015;14(3):87-9.
  33. Smith L RL, Schmidt M. Best practices in the reporting of participatory action research: Embracing both the forest and the trees. *The Counselling Psychologist*. 2010;38(8):1115-1138.
  34. Statistique Canada, Definitions of rural. *Rural and Small Town Canada Analysis Bulletin*. 2001;3(3):1- 17.
  35. Savoie-Zajc L. Comment peut-on construire un échantillonnage scientifiquement valide? *Recherches Qualitatives*; 2007(5):99-111.
  36. Boivin A, Lehoux P, Burgers J, Grol R. What are the key ingredients for effective public involvement in health care improvement and policy decisions? A randomized trial process evaluation. *Milbank Q*. 2014;92(2):319-50.
  37. Damschroder LJ, Aron DC, Keith RE, Kirsh SR, Alexander JA, Lowery JC. Fostering implementation of health services research findings into practice: a consolidated framework for advancing implementation science. *Implement Sci*. 2009;4:50.
  38. MacDougall C, Fudge E. Planning and recruiting the sample for focus groups and in-depth interviews. *Qual Health Res*. 2001;11(1):117-26.
  39. Morgan DL, Keueger, R. A. *The Focus Group Kit (six book set)*. Thousand Oaks, Calif: Sage. 1998.
  40. Savoie-Zajc L. L'entrevue semi-dirigée. Dans B. Gauthier (Dir.) : *Recherche sociale : de la problématique à la collecte de données (5e édition)*. Québec, Québec : Presses de l'Université du Québec. 2009.

- 1
- 2
- 3 41. Paillé P, & Mucchielli, A. L'analyse qualitative en sciences humaines et sociales. Armand
- 4 Colin. 2012.
- 5
- 6
- 7 42. Thomas D. A General Inductive Approach for Analyzing Qualitative Evaluation Data.
- 8 2006; 27 (2): 237-246.
- 9
- 10 43. Jones J, Hunter D. Consensus methods for medical and health services research. *Bmj*.
- 11 1995;311(7001):376-80.
- 12
- 13 44. Schull MJ HC, Guttman A, Leaver CA, Vermeulen M, Rowe BH, Anderson GM,
- 14 Zwarenstein M. . Development of a Consensus on Evidence-Based Quality of Care
- 15 Indicators for Canadian Emergency Departments. ICES Investigative Report. Toronto:
- 16 Institute for Clinical Evaluative Sciences; 2010.
- 17
- 18
- 19 45. Layani G, Fleet R, Dallaire R, Tounkara FK, Poitras J, Archambault P, et al. The challenges
- 20 of measuring quality-of-care indicators in rural emergency departments: a cross-sectional
- 21 descriptive study. *CMAJ Open*. 2016;4(3):E398-e403.
- 22
- 23
- 24 46. Israel BA, Schulz AJ, Parker EA, Becker AB. Review of community-based research:
- 25 assessing partnership approaches to improve public health. *Annu Rev Public Health*.
- 26 1998;19:173-202.
- 27
- 28 47. Jagosh J, Macaulay AC, Pluye P, Salsberg J, Bush PL, Henderson J, et al. Uncovering the
- 29 benefits of participatory research: implications of a realist review for health research and
- 30 practice. *Milbank Q*. 2012;90(2):311-46.
- 31
- 32
- 33 48. Parsons JE, Merlin TL, Taylor JE, Wilkinson D, Hiller JE. Evidence-based practice in rural
- 34 and remote clinical practice: where is the evidence? *Aust J Rural Health*. 2003;11(5):242-8.
- 35
- 36
- 37
- 38
- 39
- 40
- 41
- 42
- 43
- 44
- 45
- 46
- 47
- 48
- 49
- 50
- 51
- 52
- 53
- 54
- 55
- 56
- 57
- 58
- 59
- 60
